# Supplementary material
Source: PubMed Central journal article supplement (PMC4402273)
Supplement: NIHMS668501-supplement-1.pdf [file NIHMS668501-supplement-1.pdf]

**A**

| Sample        | MeDIP-seq   |                     |                   | RNA-seq     |                     |                   |
|---------------|-------------|---------------------|-------------------|-------------|---------------------|-------------------|
|               | Total Reads | Total Aligned Reads | Final Alignment % | Total Reads | Total Aligned Reads | Final Alignment % |
| Veh naïve     | 10685204    | 7828435             | 73.26             | 17849455    | 15799700            | 88.52             |
| Veh naïve     | 10771867    | 7952542             | 73.83             | 17319259    | 15366082            | 88.72             |
| TCDD naïve    | 11055349    | 8074411             | 73.04             | 17077486    | 15247469            | 89.28             |
| TCDD naïve    | 10771139    | 7793378             | 72.35             | 17024874    | 15054457            | 88.43             |
| Veh infected  | 11487195    | 8215175             | 71.52             | 22746718    | 20149830            | 88.58             |
| Veh infected  | 11716300    | 8277321             | 70.65             | 17306600    | 15157065            | 87.58             |
| TCDD infected | 8766618     | 7204104             | 82.18             | 15983221    | 14189003            | 88.77             |
| TCDD infected | 10428317    | 8436774             | 80.90             | 20009164    | 17798903            | 88.95             |

**B**

| Sample        | Correlation coefficient (R) | p-value  |
|---------------|-----------------------------|----------|
| Veh naïve     | 0.9973787                   | p<0.0001 |
| TCDD naïve    | 0.9966885                   | p<0.0001 |
| Veh infected  | 0.9973316                   | p<0.0001 |
| TCDD infected | 0.9974835                   | p<0.0001 |

**C**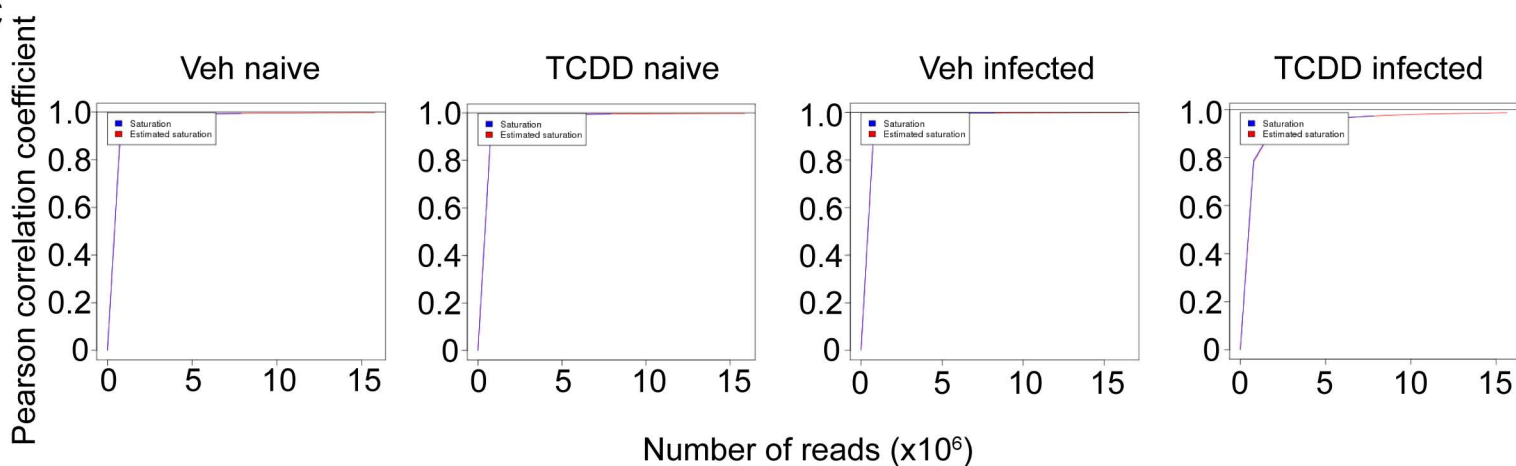**D**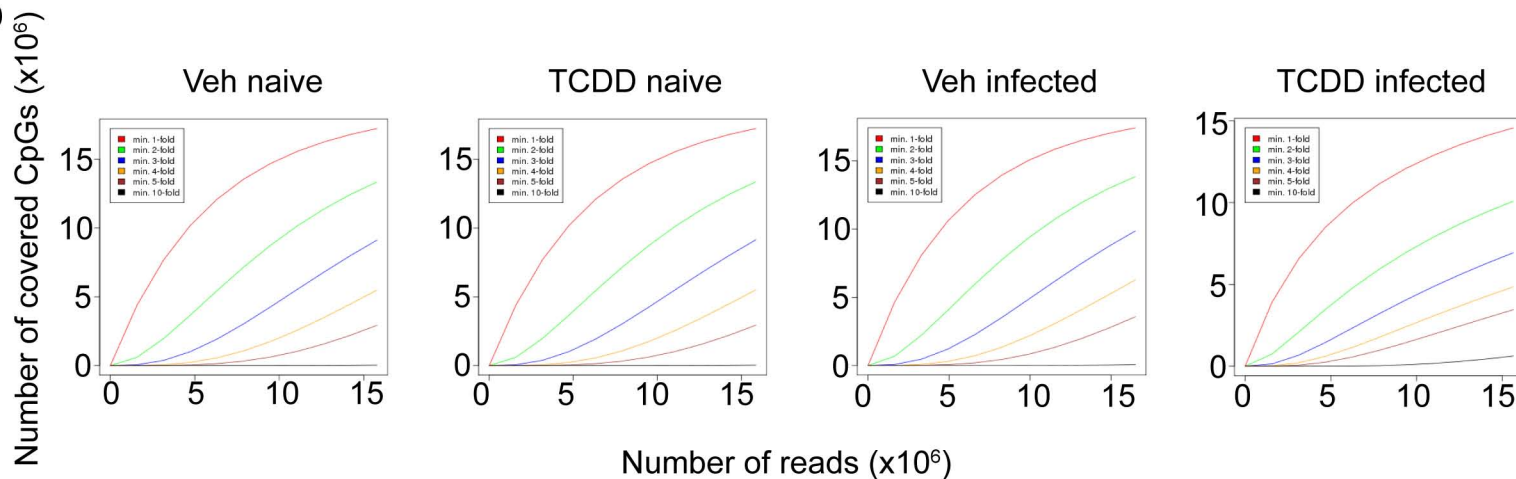**Supplemental Figure 1**

**SUPPLEMENTAL FIGURE 1.** Quality control assessments of MeDIP-seq and RNA-seq are shown. **(A)** Following high-throughput sequencing, MeDIP-seq and RNA-seq reads were aligned to the mouse genome. **(B)** Correlation determination of gene body methylation of two independently generated samples for each treatment group is shown. **(C)** Saturation analysis was performed using MEDIPS R package MEDIPS.saturationAnalysis. **(D)** Sequence pattern coverage analysis was performed using the MEDIPS.coverageAnalysis function of MEDIPS R package.

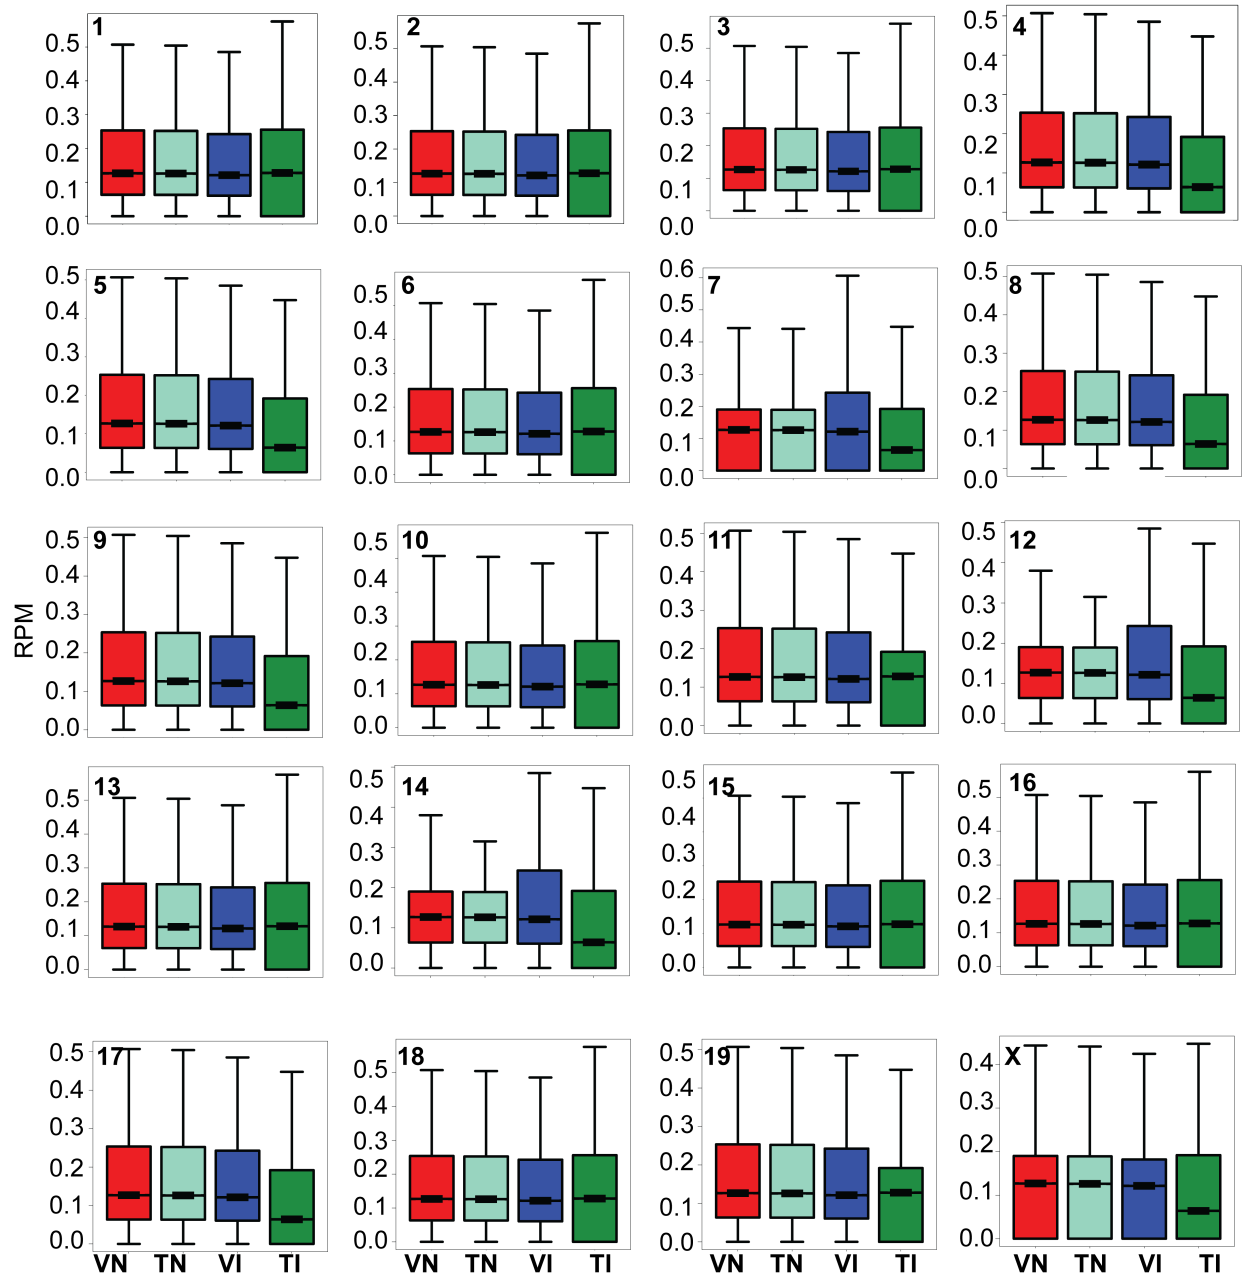

Supplemental Figure 2

**SUPPLEMENTAL FIGURE 2.** Overall DNA methylation of each chromosome is presented. Boxplot representations were used to quantitatively assess the methylation levels in purified CD8<sup>+</sup> T cells from the Veh naïve (VN), TCDD naïve (TN), Veh Infected (VI) and TCDD infected (TI) groups. RPM values were plotted as boxplots using the boxplot function in R.

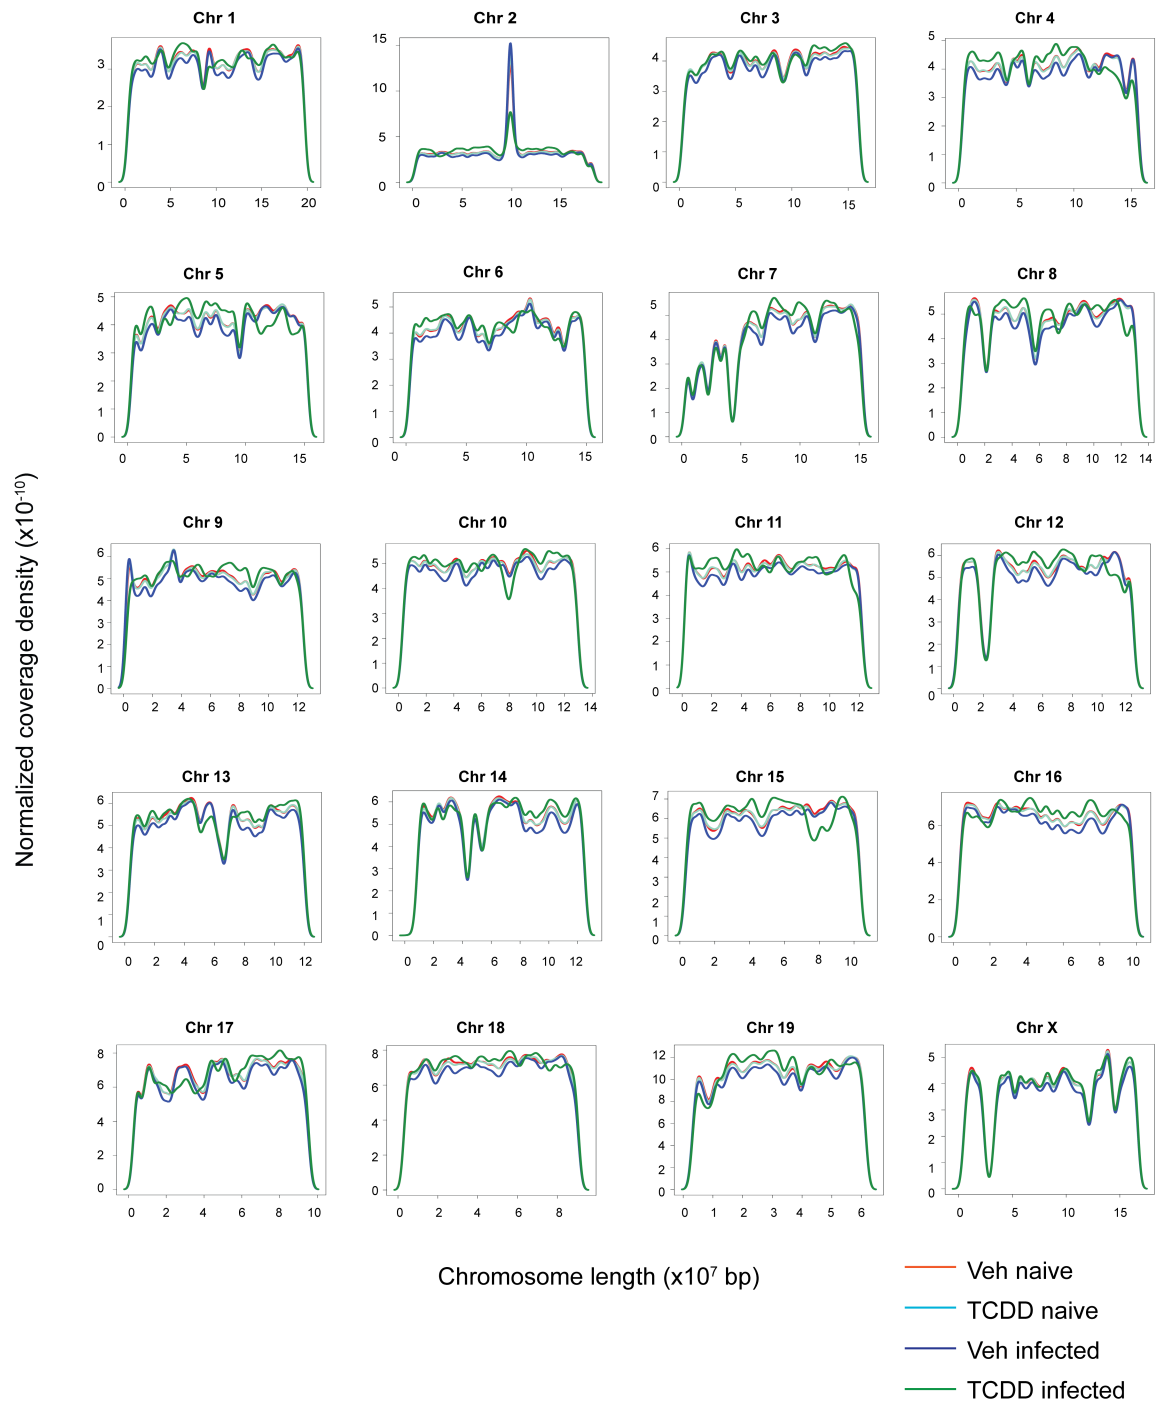

**Supplemental Figure 3**

**SUPPLEMENTAL FIGURE 3.** DNA methylation across each chromosome in isolated CD8<sup>+</sup> T cells from adult mice that were developmentally exposed to peanut oil vehicle (Veh) or TCDD is shown. Coverage density along the chromosomes was calculated, normalized to library size and plotted to visualize differences in methylation across different maternal exposure and infection of the adult offspring. Red = Veh naïve; Aquamarine = TCDD naïve; dark blue = Veh infected; green = TCDD infected.

## Supplemental Table I

| Veh naïve vs. TCDD naïve |            |           |           |        |           |            |             |                   |            |            |
|--------------------------|------------|-----------|-----------|--------|-----------|------------|-------------|-------------------|------------|------------|
| Gene                     | Chromosome | Start     | End       | Strand | Veh naïve | TCDD naïve | Fold Change | Log2(Fold Change) | p-value    | q-value    |
| Dcpp2                    | chr17      | 24035688  | 24037754  | +      | 1.68838   | 24.0749    | 14.26       | 3.83              | 0.00000000 | 0.00000000 |
| Dcpp3                    | chr17      | 24054424  | 24056408  | +      | 1.02644   | 14.2303    | 13.89       | 3.80              | 0.00000000 | 0.00000001 |
| Abpe                     | chr7       | 32087787  | 32089996  | +      | 0.447863  | 5.97193    | 13.33       | 3.74              | 0.00013707 | 0.02390510 |
| Abph                     | chr7       | 32075537  | 32076835  | -      | 0.724723  | 6.09426    | 8.41        | 3.07              | 0.00024787 | 0.03848990 |
| Obp1a                    | chrX       | 75330843  | 75336713  | -      | 1.88565   | 14.1855    | 7.52        | 2.91              | 0.00000000 | 0.00000000 |
| BC048546                 | chr6       | 128489839 | 128531624 | -      | 0.120928  | 0.855967   | 7.08        | 2.82              | 0.00000084 | 0.00025058 |
| Rag1                     | chr2       | 101478410 | 101489689 | -      | 0.183758  | 1.00764    | 5.48        | 2.46              | 0.00000000 | 0.00000116 |
| Gm5938                   | chrX       | 75370805  | 75375742  | +      | 1.71591   | 8.69463    | 5.07        | 2.34              | 0.00000000 | 0.00000082 |
| Gm1553                   | chr10      | 81949277  | 81955363  | -      | 1.32016   | 6.49204    | 4.92        | 2.30              | 0.00002240 | 0.00510066 |
| Car6                     | chr4       | 149561124 | 149575244 | -      | 1.48222   | 7.08296    | 4.78        | 2.26              | 0.00000000 | 0.00000000 |
| Dcpp1                    | chr17      | 24017842  | 24019820  | +      | 1.13061   | 5.08321    | 4.50        | 2.17              | 0.00010290 | 0.01892540 |
| Gm14743                  | chrX       | 75485800  | 75491260  | -      | 2.98457   | 12.5281    | 4.20        | 2.07              | 0.00000000 | 0.00000000 |
| Smr3a                    | chr5       | 88431549  | 88437559  | +      | 10.7304   | 39.1679    | 3.65        | 1.87              | 0.00000000 | 0.00000000 |
| Bpifa2                   | chr2       | 153834011 | 153841809 | +      | 31.4971   | 108.325    | 3.44        | 1.78              | 0.00000000 | 0.00000000 |
| 2310057J18Rik            | chr10      | 28692093  | 28706112  | -      | 2.10405   | 6.61       | 3.14        | 1.65              | 0.00000002 | 0.00000641 |
| Amy1                     | chr3       | 113258869 | 113280668 | -      | 8.63406   | 26.4694    | 3.07        | 1.62              | 0.00000000 | 0.00000000 |
| Chia                     | chr3       | 105916299 | 105935034 | +      | 2.59563   | 6.16452    | 2.08        | 1.06              | 0.00000040 | 0.00125194 |
| Cln4-2                   | chr7       | 7235026   | 7252222   | -      | 15.103    | 24.8069    | 1.64        | 0.72              | 0.00000000 | 0.00000000 |
| Acpp                     | chr9       | 104190569 | 104240052 | -      | 8.26675   | 13.1164    | 1.59        | 0.67              | 0.00000000 | 0.00000000 |
| Coro2a                   | chr4       | 46549808  | 46614801  | -      | 6.61259   | 9.98516    | 1.51        | 0.59              | 0.00000002 | 0.00000641 |
| N4bp3                    | chr11      | 51456590  | 51471183  | -      | 4.09833   | 6.16442    | 1.50        | 0.59              | 0.00013365 | 0.02371780 |
| Cfl2                     | chr12      | 55959805  | 55963864  | -      | 6.3728    | 8.99114    | 1.41        | 0.50              | 0.00017914 | 0.02987890 |
| Nrp2                     | chr1       | 62749890  | 62865266  | +      | 2.96129   | 4.13959    | 1.40        | 0.48              | 0.00004504 | 0.00893312 |
| Lgals1                   | chr15      | 78757154  | 78760895  | +      | 32.0165   | 43.9401    | 1.37        | 0.46              | 0.00002215 | 0.00476677 |
| Tbcd16                   | chr11      | 119004356 | 119089813 | -      | 3.34656   | 4.42136    | 1.32        | 0.40              | 0.00032504 | 0.04780600 |
| Hsph1                    | chr5       | 150419419 | 150438890 | -      | 41.8187   | 52.6586    | 1.26        | 0.33              | 0.00000456 | 0.00124753 |
| Vamp1                    | chr6       | 125165598 | 125172324 | +      | 17.6028   | 22.0276    | 1.25        | 0.32              | 0.00007830 | 0.01494350 |
| Luc7l3                   | chr11      | 94152452  | 94183225  | -      | 33.6216   | 40.9067    | 1.22        | 0.28              | 0.00019734 | 0.03168430 |
| Tapbp                    | chr17      | 34056422  | 34066235  | +      | 149.414   | 166.661    | 1.12        | 0.16              | 0.00000061 | 0.00018760 |
| Srsf1                    | chr11      | 87861172  | 87867259  | +      | 70.2053   | 78.3087    | 1.12        | 0.16              | 0.00000289 | 0.00083477 |
| Hdac7                    | chr15      | 97614795  | 97674933  | -      | 75.8519   | 84.2117    | 1.11        | 0.15              | 0.00000001 | 0.00000511 |
| Sipa1                    | chr19      | 5651184   | 5663707   | -      | 66.819    | 74.1539    | 1.11        | 0.15              | 0.00000557 | 0.00144568 |
| Dnmt1                    | chr9       | 20711649  | 20764332  | -      | 36.8058   | 40.4777    | 1.10        | 0.14              | 0.00018860 | 0.03076880 |
| Ddx6                     | chr9       | 44412974  | 44448814  | +      | 126.792   | 119.089    | 0.94        | -0.09             | 0.00023052 | 0.03643330 |
| Foxp1                    | chr6       | 98875335  | 99385339  | -      | 51.6981   | 47.5284    | 0.92        | -0.12             | 0.00000636 | 0.00160900 |
| ErbB2ip                  | chr13      | 104608865 | 104710594 | -      | 56.676    | 51.9424    | 0.92        | -0.13             | 0.00006376 | 0.01240220 |
| Satb1                    | chr17      | 51875511  | 51972615  | -      | 139.75    | 127.183    | 0.91        | -0.14             | 0.00000000 | 0.00000001 |
| Ubr5                     | chr15      | 37897082  | 38008608  | -      | 33.925    | 30.3623    | 0.89        | -0.16             | 0.00001211 | 0.00284862 |
| Cmah                     | chr13      | 24419288  | 24569154  | +      | 69.5646   | 61.3712    | 0.88        | -0.18             | 0.00025115 | 0.03848990 |
| Ino80d                   | chr1       | 63094374  | 63160841  | -      | 13.4753   | 11.818     | 0.88        | -0.19             | 0.00002820 | 0.00582229 |
| Tnrc6b                   | chr15      | 80541742  | 80771516  | +      | 21.7136   | 19.0222    | 0.88        | -0.19             | 0.00000001 | 0.00000272 |
| Txnip                    | chr3       | 96359690  | 96370724  | +      | 347.334   | 289.287    | 0.83        | -0.26             | 0.00000000 | 0.00000000 |
| Irga4                    | chr2       | 79095582  | 79269145  | +      | 72.7364   | 60.569     | 0.83        | -0.26             | 0.00016111 | 0.02762000 |
| Macf1                    | chr4       | 123026875 | 123361603 | -      | 116.849   | 95.8689    | 0.82        | -0.29             | 0.00000004 | 0.00001325 |
| Zfp36                    | chr7       | 29161802  | 29164247  | -      | 77.1101   | 62.7344    | 0.81        | -0.30             | 0.00008978 | 0.01681800 |
| P2ry10                   | chrX       | 104284673 | 104300309 | +      | 46.5771   | 37.7813    | 0.81        | -0.30             | 0.00010809 | 0.01952440 |
| Il7r                     | chr15      | 9435913   | 9459631   | -      | 217.491   | 175.74     | 0.81        | -0.31             | 0.00001186 | 0.00284862 |
| Mdn1                     | chr4       | 32744093  | 32862192  | +      | 29.3075   | 23.6652    | 0.81        | -0.31             | 0.00000773 | 0.00190821 |
| Ilfng1                   | chr10      | 19311763  | 19330031  | +      | 66.7863   | 53.9023    | 0.81        | -0.31             | 0.00003835 | 0.00775827 |
| Syne1                    | chr10      | 5151833   | 5326342   | +      | 18.8977   | 15.1438    | 0.80        | -0.32             | 0.00000016 | 0.00005268 |
| Lpp                      | chr16      | 24392641  | 24992664  | +      | 3.18652   | 2.53094    | 0.79        | -0.33             | 0.00032611 | 0.04780600 |
| Fam46c                   | chr3       | 100275458 | 100293115 | -      | 23.1355   | 17.9516    | 0.78        | -0.37             | 0.00018019 | 0.02987890 |
| Ddx60                    | chr8       | 64406885  | 64516492  | +      | 12.3424   | 9.51571    | 0.77        | -0.38             | 0.00001678 | 0.00368889 |
| Gm4759                   | chr7       | 113565063 | 113584587 | -      | 30.5121   | 23.4602    | 0.77        | -0.38             | 0.00000342 | 0.00096052 |
| Lars2                    | chr9       | 123276057 | 123371782 | +      | 512.265   | 391.747    | 0.76        | -0.39             | 0.00001582 | 0.00355604 |
| Zfp3612                  | chr17      | 84583268  | 84587287  | -      | 230.321   | 170.87     | 0.74        | -0.43             | 0.00000000 | 0.00000038 |
| Dusp2                    | chr2       | 127161894 | 127164113 | +      | 119.215   | 88.1873    | 0.74        | -0.43             | 0.00000000 | 0.00000094 |
| Tnfrsf3                  | chr10      | 18720716  | 18735216  | -      | 21.4588   | 15.8126    | 0.74        | -0.44             | 0.00000000 | 0.00000121 |
| Tsc22d3                  | chrX       | 137074067 | 137135061 | -      | 217.045   | 157.482    | 0.73        | -0.46             | 0.00000000 | 0.00000001 |
| Junb                     | chr8       | 87500807  | 87502647  | -      | 54.7248   | 39.109     | 0.71        | -0.48             | 0.00000000 | 0.00000113 |
| Ddit4                    | chr10      | 59412422  | 59414518  | -      | 124.413   | 86.2809    | 0.69        | -0.53             | 0.00000000 | 0.00000000 |
| Cxcr4                    | chr1       | 130484775 | 130488876 | -      | 101.464   | 68.4012    | 0.67        | -0.57             | 0.00000000 | 0.00000000 |
| Slc15a2                  | chr16      | 36750249  | 36785048  | -      | 7.72456   | 4.95818    | 0.64        | -0.64             | 0.00000019 | 0.00006117 |
| Abca1                    | chr4       | 53043660  | 53172767  | -      | 8.71989   | 5.35373    | 0.61        | -0.70             | 0.00000000 | 0.00000000 |
| Ppp1r15a                 | chr7       | 52778287  | 52781638  | -      | 11.5446   | 6.70696    | 0.58        | -0.78             | 0.00000000 | 0.00000010 |
| Dusp1                    | chr17      | 26642535  | 26645417  | -      | 4.48836   | 2.15518    | 0.48        | -1.06             | 0.00001415 | 0.00325201 |
| Fos                      | chr12      | 86814850  | 86818219  | +      | 8.48935   | 2.96455    | 0.35        | -1.52             | 0.00000000 | 0.00000000 |
| Jun                      | chr4       | 94715726  | 94718913  | +      | 3.12004   | 1.06595    | 0.34        | -1.55             | 0.00000000 | 0.00000071 |
| Hspa1b                   | chr17      | 35093373  | 35096183  | -      | 0.812455  | 0.143266   | 0.18        | -2.50             | 0.00028602 | 0.04318000 |

| Veh infected vs. TCDD infected |            |           |           |        |              |               |             |                   |            |            |
|--------------------------------|------------|-----------|-----------|--------|--------------|---------------|-------------|-------------------|------------|------------|
| Gene                           | Chromosome | Start     | End       | Strand | Veh infected | TCDD infected | Fold Change | Log2(Fold Change) | p-value    | q-value    |
| Atp6v0c-ps2                    | chr17      | 24300831  | 24306374  | -      | 0            | 9.24701       | Inf         |                   | 0.00000023 | 0.00002112 |
| Gm5111                         | chr6       | 48539443  | 48540583  | +      | 0            | 0.913104      | Inf         |                   | 0.00156588 | 0.04201960 |
| Rag1                           | chr2       | 101478410 | 101489689 | -      | 0.0392739    | 2.23153       | 56.82       | 5.83              | 0.00000000 | 0.00000000 |
| Hspa1b                         | chr17      | 35093373  | 35096183  | -      | 0.0651079    | 3.07092       | 47.17       | 5.56              | 0.00000001 | 0.00000090 |
| Camkv                          | chr9       | 107838250 | 107852022 | +      | 0.0274514    | 0.898682      | 32.74       | 5.03              | 0.00167713 | 0.04434810 |
| Gfra1                          | chr19      | 58311181  | 58528956  | -      | 0.0538691    | 1.04024       | 19.31       | 4.27              | 0.00002544 | 0.00127389 |
| Arpp21                         | chr9       | 111967594 | 112251429 | -      | 0.131399     | 1.94622       | 14.81       | 3.89              | 0.00000087 | 0.00006912 |
| S100a9                         | chr3       | 90496554  | 90499613  | -      | 0.557528     | 7.7703        | 13.94       | 3.80              | 0.00001275 | 0.00071070 |
| Fads2                          | chr19      | 10138653  | 10175993  | -      | 0.143746     | 1.50602       | 10.48       | 3.39              | 0.00106187 | 0.03058130 |
| Alas2                          | chrX       | 146981959 | 147005165 | +      | 0.200757     | 1.64379       | 8.19        | 3.03              | 0.00007858 | 0.00329716 |
| Hbb-b1                         | chr7       | 110961037 | 110962437 | -      | 0.784073     | 5.67311       | 7.24        | 2.86              | 0.00003290 | 0.00159619 |

|               |       |           |           |   |          |          |      |      |            |            |
|---------------|-------|-----------|-----------|---|----------|----------|------|------|------------|------------|
| Hba-a1        | chr11 | 32196488  | 32197310  | + | 2.78088  | 19.1744  | 6.90 | 2.79 | 0.00000000 | 0.00000000 |
| S100a8        | chr3  | 90472992  | 90473956  | + | 1.15489  | 7.76255  | 6.72 | 2.75 | 0.00045146 | 0.01473420 |
| Endou         | chr15 | 97541449  | 97561836  | + | 0.302492 | 1.97952  | 6.54 | 2.71 | 0.00000108 | 0.00008322 |
| Beta-s        | chr7  | 110975036 | 110976442 | - | 4.58891  | 27.7523  | 6.05 | 2.60 | 0.00000000 | 0.00000000 |
| Klrb1b        | chr6  | 128763723 | 128776333 | - | 0.357467 | 1.94823  | 5.45 | 2.45 | 0.00000753 | 0.00044252 |
| Rapgef3       | chr15 | 97575200  | 97598097  | - | 0.161896 | 0.870353 | 5.38 | 2.43 | 0.00008008 | 0.00334736 |
| Cdc25c        | chr18 | 34892650  | 34911187  | - | 0.404552 | 2.11661  | 5.23 | 2.39 | 0.00001777 | 0.00094195 |
| Hepacam2      | chr6  | 3407088   | 3444498   | - | 0.262696 | 1.17868  | 4.49 | 2.17 | 0.00087848 | 0.02608560 |
| Fam64a        | chr11 | 71856003  | 71860872  | + | 0.837463 | 3.75341  | 4.48 | 2.16 | 0.00000082 | 0.00006522 |
| Pon3          | chr6  | 5170851   | 5206233   | - | 0.883323 | 3.86402  | 4.37 | 2.13 | 0.00000020 | 0.00001874 |
| BCO30867      | chr11 | 102110195 | 102126497 | + | 0.277605 | 1.19751  | 4.31 | 2.11 | 0.00026429 | 0.00935410 |
| Capn5         | chr7  | 105270074 | 105333309 | - | 0.292697 | 1.22534  | 4.19 | 2.07 | 0.00000345 | 0.00021806 |
| Chi3l3        | chr3  | 105950471 | 105970482 | - | 0.637522 | 2.60947  | 4.09 | 2.03 | 0.00008691 | 0.00361904 |
| Fkbp11        | chr15 | 98554798  | 98558629  | - | 0.926927 | 3.72917  | 4.02 | 2.01 | 0.00106928 | 0.03058130 |
| Fn1           | chr1  | 71632096  | 71699745  | - | 0.641356 | 2.49836  | 3.90 | 1.96 | 0.00000000 | 0.00000000 |
| Smo           | chr6  | 29685496  | 29711366  | + | 0.328939 | 1.27776  | 3.88 | 1.96 | 0.00001484 | 0.00080246 |
| 2010001M09Rik | chr18 | 35806918  | 35809021  | - | 11.6127  | 44.1609  | 3.80 | 1.93 | 0.00000000 | 0.00000000 |
| Sirpa         | chr2  | 129418574 | 129457964 | + | 0.455602 | 1.70299  | 3.74 | 1.90 | 0.00000047 | 0.00003932 |
| Cd93          | chr2  | 148262386 | 148269271 | - | 0.380881 | 1.41785  | 3.72 | 1.90 | 0.00000001 | 0.00000000 |
| Pif1          | chr9  | 65435011  | 65443769  | + | 0.447811 | 1.64093  | 3.66 | 1.87 | 0.00000040 | 0.00024419 |
| Cacna1h       | chr17 | 25507497  | 25570728  | - | 0.314201 | 1.1479   | 3.65 | 1.87 | 0.00000001 | 0.00000107 |
| Mki67         | chr7  | 142881470 | 142908062 | - | 6.60571  | 23.621   | 3.58 | 1.84 | 0.00000000 | 0.00000000 |
| Cenpf         | chr1  | 191464492 | 191511965 | - | 0.721849 | 2.56775  | 3.56 | 1.83 | 0.00000000 | 0.00000000 |
| Itga1         | chr13 | 115748288 | 115892172 | - | 0.363074 | 1.2744   | 3.51 | 1.81 | 0.00000038 | 0.00003272 |
| Pr5           | chr15 | 84511427  | 84534103  | + | 0.938333 | 3.23372  | 3.45 | 1.79 | 0.00001359 | 0.00075089 |
| E2f8          | chr7  | 56121798  | 56136411  | - | 1.1452   | 3.74048  | 3.27 | 1.71 | 0.00000000 | 0.00000002 |
| Spag5         | chr11 | 78115092  | 78135956  | + | 1.45339  | 4.69472  | 3.23 | 1.69 | 0.00000000 | 0.00000000 |
| Emp1          | chr6  | 135312948 | 135333191 | + | 1.00185  | 3.19791  | 3.19 | 1.67 | 0.00000051 | 0.00004235 |
| Dntt          | chr19 | 41103764  | 41134015  | + | 3.92482  | 12.5123  | 3.19 | 1.67 | 0.00000000 | 0.00000000 |
| Rhobtb1       | chr10 | 68671299  | 68754532  | + | 0.266041 | 0.842993 | 3.17 | 1.66 | 0.00094789 | 0.02776740 |
| Lamc1         | chr1  | 155066051 | 155179916 | - | 0.49377  | 1.54691  | 3.13 | 1.65 | 0.00000001 | 0.00000084 |
| Ccdc18        | chr5  | 108561932 | 108661968 | + | 0.284505 | 0.888009 | 3.12 | 1.64 | 0.00026012 | 0.00923856 |
| Kntc1         | chr5  | 124199734 | 124271602 | + | 0.632325 | 1.96381  | 3.11 | 1.63 | 0.00000000 | 0.00000011 |
| Tk            | chr9  | 83728295  | 83765997  | + | 0.566086 | 1.74766  | 3.09 | 1.63 | 0.00009839 | 0.00402009 |
| Gpr56         | chr8  | 97501008  | 97538108  | + | 0.434051 | 1.32888  | 3.06 | 1.61 | 0.00025109 | 0.00897660 |
| Mcm10         | chr2  | 4911769   | 4933837   | - | 0.979019 | 2.99422  | 3.06 | 1.61 | 0.00000003 | 0.00000330 |
| Csflr         | chr18 | 61265225  | 61290793  | + | 0.442623 | 1.33714  | 3.02 | 1.59 | 0.00010457 | 0.00425631 |
| Casc5         | chr2  | 118872854 | 118929857 | + | 0.946212 | 2.85044  | 3.01 | 1.59 | 0.00000000 | 0.00000000 |
| Mpp2          | chr11 | 101918330 | 101949829 | + | 0.37252  | 1.09759  | 2.95 | 1.56 | 0.00042419 | 0.01405500 |
| Esm1          | chr13 | 113999866 | 114008312 | + | 1.03198  | 3.03036  | 2.94 | 1.55 | 0.00004447 | 0.00210129 |
| Aspm          | chr1  | 141351349 | 141390665 | + | 0.728638 | 2.13705  | 2.93 | 1.55 | 0.00000000 | 0.00000000 |
| Orc1          | chr4  | 108252058 | 108287436 | + | 0.569675 | 1.66884  | 2.93 | 1.55 | 0.00016314 | 0.00626486 |
| Clspn         | chr4  | 126234223 | 126271147 | + | 1.48037  | 4.30119  | 2.91 | 1.54 | 0.00000000 | 0.00000000 |
| Ccne2         | chr4  | 11118500  | 11181406  | + | 0.675996 | 1.94237  | 2.87 | 1.52 | 0.00075439 | 0.02307900 |
| Denn25b       | chr6  | 148936590 | 149050202 | - | 0.351197 | 1.00735  | 2.87 | 1.52 | 0.00000076 | 0.00006093 |
| Itgam         | chr7  | 135206153 | 135262005 | + | 0.754914 | 2.16307  | 2.87 | 1.52 | 0.00000000 | 0.00000025 |
| Shcbp1        | chr8  | 4735979   | 4779534   | - | 1.42996  | 4.03533  | 2.82 | 1.50 | 0.00000364 | 0.00022479 |
| Kif11         | chr19 | 37450892  | 37496349  | + | 3.14335  | 8.87042  | 2.82 | 1.50 | 0.00000000 | 0.00000000 |
| Rpl26         | chr11 | 68715067  | 68718036  | + | 5.83725  | 16.4601  | 2.82 | 1.50 | 0.00158764 | 0.04229040 |
| Gzmb          | chr14 | 56877694  | 56881097  | - | 16.6602  | 46.8529  | 2.81 | 1.49 | 0.00000000 | 0.00000000 |
| Igj           | chr5  | 88948833  | 88956922  | - | 102.808  | 287.198  | 2.79 | 1.48 | 0.00000000 | 0.00000000 |
| Ckap2l        | chr2  | 129093945 | 129122948 | - | 1.5773   | 4.37111  | 2.77 | 1.47 | 0.00000001 | 0.00000090 |
| Esp1l         | chr15 | 102126723 | 102154787 | + | 0.982963 | 2.68748  | 2.73 | 1.45 | 0.00000000 | 0.00000005 |
| Ckap4         | chr10 | 83989049  | 83996633  | - | 1.39352  | 3.80083  | 2.73 | 1.45 | 0.00000034 | 0.00022994 |
| Neil3         | chr8  | 54672220  | 54724419  | - | 1.14     | 3.10747  | 2.73 | 1.45 | 0.00003255 | 0.00158619 |
| Nusap1        | chr2  | 119435267 | 119475896 | + | 2.96901  | 8.08801  | 2.72 | 1.45 | 0.00000000 | 0.00000000 |
| Pbk           | chr14 | 66424747  | 66436659  | + | 1.13494  | 3.07733  | 2.71 | 1.44 | 0.00058546 | 0.01855760 |
| Coro2b        | chr9  | 62267298  | 62384851  | - | 0.404615 | 1.09535  | 2.71 | 1.44 | 0.00174930 | 0.04537320 |
| Gzma          | chr13 | 113884034 | 113891189 | - | 36.3571  | 98.0803  | 2.70 | 1.43 | 0.00000000 | 0.00000000 |
| Cx3cr1        | chr9  | 119957810 | 119977400 | - | 0.463037 | 1.24545  | 2.69 | 1.43 | 0.00071761 | 0.02209340 |
| Sipi          | chr2  | 164179805 | 164182243 | - | 26.795   | 71.8872  | 2.68 | 1.42 | 0.00000000 | 0.00000000 |
| Il2ra         | chr2  | 11564418  | 11614821  | + | 3.46072  | 9.82255  | 2.68 | 1.42 | 0.00000000 | 0.00000000 |
| Raph1         | chr1  | 60540028  | 60623609  | - | 0.326569 | 0.875319 | 2.68 | 1.42 | 0.00001857 | 0.00097516 |
| Cdca2         | chr14 | 68294410  | 68333898  | - | 1.19026  | 3.18426  | 2.68 | 1.42 | 0.00000001 | 0.00000115 |
| Ube2c         | chr2  | 164595428 | 164598402 | + | 5.95002  | 15.7005  | 2.64 | 1.40 | 0.00000005 | 0.00000499 |
| Melk          | chr4  | 44313788  | 44377547  | + | 1.00202  | 2.63786  | 2.63 | 1.40 | 0.00002936 | 0.00145060 |
| Sgol1         | chr17 | 53814111  | 53828640  | - | 0.822343 | 2.16468  | 2.63 | 1.40 | 0.00002366 | 0.00120157 |
| Bub1          | chr2  | 127625935 | 127657595 | - | 1.26342  | 3.32063  | 2.63 | 1.39 | 0.00000000 | 0.00000005 |
| Fam129b       | chr2  | 32731653  | 32816775  | + | 1.00228  | 2.62499  | 2.62 | 1.39 | 0.00000358 | 0.00022387 |
| Ncapg2        | chr12 | 117643874 | 117702004 | + | 2.08084  | 5.3927   | 2.59 | 1.37 | 0.00000000 | 0.00000000 |
| Stac2         | chr11 | 97897937  | 97914776  | - | 0.711328 | 1.84171  | 2.59 | 1.37 | 0.00034755 | 0.01191540 |
| Cenpe         | chr3  | 134875526 | 134936504 | + | 1.36755  | 3.52341  | 2.58 | 1.37 | 0.00000000 | 0.00000000 |
| Stil          | chr4  | 114672722 | 114715803 | + | 0.617595 | 1.58059  | 2.56 | 1.36 | 0.00018183 | 0.00095657 |
| Kif2c         | chr4  | 116832240 | 116855229 | - | 1.36589  | 3.48981  | 2.55 | 1.35 | 0.00000362 | 0.00022457 |
| Cena2         | chr3  | 36451527  | 36470918  | - | 6.64967  | 16.9396  | 2.55 | 1.35 | 0.00000000 | 0.00000000 |
| Nek2          | chr1  | 193645351 | 193656928 | + | 2.04856  | 5.21464  | 2.55 | 1.35 | 0.00000001 | 0.00000121 |
| Chdh          | chr14 | 30822185  | 31340242  | + | 0.441504 | 1.12379  | 2.55 | 1.35 | 0.00017459 | 0.00663430 |
| Kif4          | chrX  | 97821403  | 97922610  | + | 1.17977  | 3.00265  | 2.55 | 1.35 | 0.00000004 | 0.00000463 |
| Lyz2          | chr10 | 116714596 | 116719328 | - | 9.45487  | 24.0389  | 2.54 | 1.35 | 0.00000000 | 0.00000000 |
| Birc5         | chr11 | 117710550 | 117717057 | + | 7.39789  | 18.7856  | 2.54 | 1.34 | 0.00000000 | 0.00000016 |
| Kif14         | chr1  | 138364534 | 138428088 | + | 0.448183 | 1.13594  | 2.53 | 1.34 | 0.00000486 | 0.00029343 |
| Prc1          | chr7  | 87439350  | 87461145  | + | 2.74472  | 6.91928  | 2.52 | 1.33 | 0.00000000 | 0.00000003 |
| Ccnb1         | chr13 | 101548693 | 101556441 | - | 4.09422  | 10.2985  | 2.52 | 1.33 | 0.00000000 | 0.00000001 |
| Ncapg         | chr5  | 46061163  | 46248779  | + | 2.51414  | 6.32027  | 2.51 | 1.33 | 0.00000000 | 0.00000002 |
| Top2a         | chr11 | 98854260  | 98885503  | + | 11.0865  | 27.8634  | 2.51 | 1.33 | 0.00000000 | 0.00000000 |
| Rorc          | chr3  | 94176747  | 94202161  | + | 0.943001 | 2.36803  | 2.51 | 1.33 | 0.00028413 | 0.00996086 |
| Cit           | chr5  | 116295664 | 116456350 | + | 0.62701  | 1.56237  | 2.49 | 1.32 | 0.00000170 | 0.00012137 |
| Tspan2        | chr3  | 102524153 | 102576233 | + | 0.444204 | 1.10515  | 2.49 | 1.31 | 0.00037543 | 0.01267140 |
| Gins2         | chr8  | 123012765 | 123112975 | - | 2.11163  | 5.23378  | 2.48 | 1.31 | 0.00062962 | 0.01971950 |



|               |       |           |           |   |          |         |      |      |             |            |
|---------------|-------|-----------|-----------|---|----------|---------|------|------|-------------|------------|
| Depdc1a       | chr3  | 159158396 | 159192919 | + | 1.21266  | 2.99556 | 2.47 | 1.30 | 0.00000111  | 0.00008483 |
| Esco2         | chr14 | 66437863  | 66452806  | - | 1.10201  | 2.71085 | 2.46 | 1.30 | 0.00006661  | 0.00283701 |
| Hipl          | chr5  | 135882387 | 136020992 | - | 1.11409  | 2.7363  | 2.46 | 1.30 | 0.00000000  | 0.00000005 |
| Syk           | chr13 | 52678805  | 52744161  | + | 1.77937  | 4.36002 | 2.45 | 1.29 | 0.00000000  | 0.00000000 |
| Kif18b        | chr11 | 102766832 | 102786438 | - | 1.11262  | 2.71296 | 2.44 | 1.29 | 0.00002451  | 0.00123710 |
| Cdca8         | chr4  | 124595708 | 124614161 | - | 4.16265  | 10.0905 | 2.42 | 1.28 | 0.00000003  | 0.00000342 |
| Kif20a        | chr18 | 34758268  | 34811390  | + | 2.86639  | 6.92966 | 2.42 | 1.27 | 0.00000000  | 0.00000004 |
| Tpx2          | chr2  | 152673699 | 152721057 | + | 2.95022  | 7.13032 | 2.42 | 1.27 | 0.00000000  | 0.00000000 |
| Itgax         | chr7  | 135273081 | 135294171 | + | 2.48786  | 6.00258 | 2.41 | 1.27 | 0.00000000  | 0.00000002 |
| Rad51         | chr2  | 118938552 | 118961806 | + | 2.35618  | 5.67477 | 2.41 | 1.27 | 0.00000251  | 0.00016632 |
| 1500009L16Rik | chr10 | 83185609  | 83225507  | + | 4.09393  | 9.83895 | 2.40 | 1.27 | 0.00000845  | 0.00047918 |
| Mxd3          | chr13 | 55423415  | 55431091  | - | 2.18306  | 5.24101 | 2.40 | 1.26 | 0.00061056  | 0.01923350 |
| Cdc6          | chr11 | 98769202  | 98785256  | + | 1.00801  | 2.40817 | 2.39 | 1.26 | 0.00000838  | 0.00047918 |
| Rrm2          | chr12 | 25393118  | 25399011  | + | 11.1007  | 26.3764 | 2.38 | 1.25 | 0.00000000  | 0.00000000 |
| Palm          | chr10 | 79256316  | 79283641  | + | 0.942125 | 2.23847 | 2.38 | 1.25 | 0.00006490  | 0.00278783 |
| Anln          | chr9  | 22135657  | 22193650  | - | 0.741253 | 1.76085 | 2.38 | 1.25 | 0.00002459  | 0.00123710 |
| Bub1b         | chr2  | 118423946 | 118467328 | + | 3.0315   | 7.18841 | 2.37 | 1.25 | 0.00000000  | 0.00000001 |
| Lgals3        | chr14 | 47993534  | 48005842  | + | 9.80689  | 23.2025 | 2.37 | 1.24 | 0.00000000  | 0.00000000 |
| Slc9a5        | chr8  | 107872157 | 107893781 | + | 0.43806  | 1.03611 | 2.37 | 1.24 | 0.00125029  | 0.03475220 |
| 2810417H13Rik | chr9  | 65676732  | 65756601  | + | 0.08939  | 21.3894 | 2.35 | 1.23 | 0.00000000  | 0.00000000 |
| 5730590G19Rik | chr7  | 86805081  | 86859072  | + | 0.698249 | 1.63968 | 2.35 | 1.23 | 0.00000377  | 0.00023152 |
| Tk1           | chr11 | 117676832 | 117701222 | - | 4.95634  | 11.6165 | 2.34 | 1.23 | 0.00000022  | 0.00002081 |
| Aurkb         | chr11 | 68859144  | 68865164  | + | 2.8121   | 6.58664 | 2.34 | 1.23 | 0.00000207  | 0.0014201  |
| Sdc1          | chr12 | 8778201   | 8800493   | + | 1.36636  | 3.19931 | 2.34 | 1.23 | 0.00002847  | 0.00141280 |
| Farp1         | chr14 | 121434795 | 121682948 | + | 0.43259  | 1.0112  | 2.34 | 1.23 | 0.001170845 | 0.04495740 |
| Cdk1          | chr10 | 68799382  | 68815660  | - | 2.35898  | 5.5093  | 2.34 | 1.22 | 0.00000038  | 0.00003270 |
| Pld4          | chr12 | 113998865 | 114007197 | + | 2.87706  | 6.71777 | 2.33 | 1.22 | 0.00000146  | 0.00010668 |
| Gtse1         | chr15 | 85690186  | 85707003  | + | 1.27636  | 2.95977 | 2.32 | 1.21 | 0.00000540  | 0.00239891 |
| Clec12a       | chr6  | 129300261 | 129315321 | + | 1.0717   | 2.48052 | 2.31 | 1.21 | 0.00150031  | 0.04096830 |
| Ccnf          | chr17 | 24360176  | 24388354  | - | 2.3324   | 5.39763 | 2.31 | 1.21 | 0.00000014  | 0.00001389 |
| Ncaph         | chr2  | 126929545 | 126959690 | - | 2.75013  | 6.3525  | 2.31 | 1.21 | 0.00000007  | 0.00000774 |
| Prr11         | chr11 | 86902657  | 86922216  | - | 1.34658  | 3.10503 | 2.31 | 1.21 | 0.00001006  | 0.00056628 |
| Dna2          | chr10 | 62409776  | 62436936  | + | 0.88885  | 2.03733 | 2.29 | 1.20 | 0.00010852  | 0.00438442 |
| Cybb          | chrX  | 9012377   | 9046450   | - | 1.41874  | 3.24635 | 2.29 | 1.19 | 0.00000072  | 0.00005907 |
| Eaf2          | chr16 | 36792969  | 36874912  | - | 1.5864   | 3.54831 | 2.28 | 1.19 | 0.00028714  | 0.01003400 |
| Lat2          | chr5  | 135076134 | 135090893 | - | 1.86723  | 4.24086 | 2.27 | 1.18 | 0.00023906  | 0.00863170 |
| Kif15         | chr9  | 122860198 | 122927851 | + | 1.82707  | 4.14164 | 2.27 | 1.18 | 0.00000001  | 0.00000144 |
| Rad51ap1      | chr6  | 126873436 | 126889573 | - | 1.34199  | 3.03282 | 2.26 | 1.18 | 0.00151503  | 0.04114780 |
| Gzmk          | chr13 | 113962081 | 113971105 | - | 7.38159  | 16.6144 | 2.25 | 1.17 | 0.00000798  | 0.00046148 |
| Ccnb2         | chr9  | 70255495  | 70269361  | - | 6.75175  | 15.1899 | 2.25 | 1.17 | 0.00000000  | 0.00000033 |
| Klrc1         | chr6  | 129624876 | 129628928 | - | 5.52355  | 12.4211 | 2.25 | 1.17 | 0.00011977  | 0.00476812 |
| Fgl2          | chr5  | 20798778  | 20930495  | + | 3.28589  | 7.37975 | 2.25 | 1.17 | 0.00000000  | 0.00000008 |
| S100a4        | chr3  | 90407691  | 90409967  | + | 32.2243  | 71.8685 | 2.23 | 1.16 | 0.00000000  | 0.00000000 |
| C330027C09Rik | chr16 | 48994300  | 49019818  | + | 2.84713  | 6.28348 | 2.21 | 1.14 | 0.00000000  | 0.00000067 |
| Bnk1          | chr19 | 41003416  | 41069025  | - | 1.84253  | 4.06389 | 2.21 | 1.14 | 0.00018875  | 0.00700096 |
| Stmn1         | chr4  | 134024234 | 134029758 | + | 28.4329  | 62.6921 | 2.20 | 1.14 | 0.00000000  | 0.00000000 |
| Figl1         | chr11 | 11700290  | 11708965  | - | 2.36517  | 5.21459 | 2.20 | 1.14 | 0.00000015  | 0.00001490 |
| Mybl2         | chr2  | 162880370 | 162910423 | + | 2.01792  | 4.43641 | 2.20 | 1.14 | 0.00000059  | 0.00004898 |
| Hmnr          | chr11 | 40514889  | 40546939  | - | 2.02543  | 4.44982 | 2.20 | 1.14 | 0.00000021  | 0.00001982 |
| Plk1          | chr7  | 129302950 | 129313389 | + | 3.85826  | 8.46811 | 2.19 | 1.13 | 0.00000023  | 0.00002098 |
| Traip         | chr9  | 107853293 | 107874599 | + | 1.48188  | 3.22754 | 2.18 | 1.12 | 0.00019483  | 0.00720216 |
| Cd24a         | chr10 | 43298974  | 43304071  | + | 6.15724  | 13.3948 | 2.18 | 1.12 | 0.00000002  | 0.00000231 |
| Cep55         | chr19 | 38129514  | 38148915  | + | 2.38555  | 5.14348 | 2.16 | 1.11 | 0.00000178  | 0.00012649 |
| S100a6        | chr3  | 90416815  | 90418336  | + | 32.4689  | 70.0015 | 2.16 | 1.11 | 0.00000000  | 0.00000000 |
| Tns3          | chr11 | 8331654   | 8564538   | - | 0.668849 | 1.44126 | 2.15 | 1.11 | 0.00004852  | 0.00220652 |
| Alcam         | chr16 | 52249108  | 52453110  | - | 1.09079  | 2.33499 | 2.14 | 1.10 | 0.00005561  | 0.00243701 |
| Dtl           | chr1  | 193361243 | 193399413 | - | 1.59534  | 3.41224 | 2.14 | 1.10 | 0.00000795  | 0.00046148 |
| Nuf2          | chr1  | 171428064 | 171461595 | - | 2.02097  | 4.31534 | 2.14 | 1.09 | 0.00008866  | 0.00367750 |
| Rad54l        | chr4  | 115748069 | 115796295 | - | 1.15565  | 2.45991 | 2.13 | 1.09 | 0.00006683  | 0.00283701 |
| Arhgap33      | chr7  | 31307244  | 31320028  | - | 0.822452 | 1.74399 | 2.12 | 1.08 | 0.00075599  | 0.02307900 |
| Slc43a3       | chr2  | 84776802  | 84798666  | + | 2.12267  | 4.4985  | 2.12 | 1.08 | 0.00006602  | 0.00282466 |
| Eil2          | chr13 | 75844931  | 75909806  | + | 2.10704  | 4.45718 | 2.12 | 1.08 | 0.00000261  | 0.00017181 |
| Arhgap21      | chr2  | 20769545  | 20889348  | - | 0.555218 | 1.17436 | 2.12 | 1.08 | 0.00038033  | 0.01279700 |
| Anxa2         | chr9  | 69301489  | 69339592  | + | 27.2459  | 57.4778 | 2.11 | 1.08 | 0.00000000  | 0.00000000 |
| Cdca3         | chr6  | 124780193 | 124783719 | + | 6.59632  | 13.8921 | 2.11 | 1.07 | 0.00000014  | 0.00001383 |
| Adam11        | chr11 | 102622752 | 102641576 | + | 0.707882 | 1.49037 | 2.11 | 1.07 | 0.00005772  | 0.00249907 |
| Sgol2         | chr1  | 58042183  | 58083121  | + | 1.04691  | 2.20409 | 2.11 | 1.07 | 0.00000188  | 0.00013249 |
| Tcf4          | chr18 | 69504145  | 69847621  | + | 0.766897 | 1.61402 | 2.10 | 1.07 | 0.00000092  | 0.00007204 |
| Zbtb32        | chr7  | 31374699  | 31377961  | - | 2.83016  | 5.95293 | 2.10 | 1.07 | 0.00011902  | 0.00475541 |
| Ptprj         | chr2  | 90269912  | 90420804  | - | 1.25866  | 2.6474  | 2.10 | 1.07 | 0.00000026  | 0.00002322 |
| Chaf1a        | chr17 | 56179838  | 56207449  | + | 2.4677   | 5.16998 | 2.10 | 1.07 | 0.00000088  | 0.00006912 |
| Anxa1         | chr19 | 20447923  | 20465161  | - | 2.66967  | 5.59263 | 2.09 | 1.07 | 0.00070391  | 0.02180840 |
| Ckap2         | chr8  | 23278623  | 23296291  | - | 1.63941  | 3.43297 | 2.09 | 1.07 | 0.00037191  | 0.01259430 |
| Diap3         | chr14 | 87056129  | 87540921  | - | 1.65791  | 3.47051 | 2.09 | 1.07 | 0.00003390  | 0.00163767 |
| Fancd2        | chr6  | 113481675 | 113546279 | + | 0.831452 | 1.73985 | 2.09 | 1.07 | 0.00051677  | 0.01656730 |
| Neb           | chr2  | 51992166  | 52194318  | - | 0.90315  | 1.88519 | 2.09 | 1.06 | 0.00000000  | 0.00000000 |
| Dlgap5        | chr14 | 48007453  | 48038082  | - | 2.95721  | 6.1555  | 2.08 | 1.06 | 0.00000001  | 0.00000111 |
| Cks1b         | chr3  | 89219393  | 89222213  | - | 8.32091  | 17.3081 | 2.08 | 1.06 | 0.00003766  | 0.00179496 |
| Osbpl3        | chr6  | 50243325  | 50406169  | - | 1.55751  | 3.23011 | 2.07 | 1.05 | 0.00000000  | 0.00000000 |
| Prdm1         | chr10 | 44156980  | 44178493  | - | 1.18094  | 2.44497 | 2.07 | 1.05 | 0.00004945  | 0.00223907 |
| Cdc20         | chr4  | 118100697 | 118109948 | - | 6.38083  | 13.2013 | 2.07 | 1.05 | 0.00000004  | 0.00000410 |
| Mis18bp1      | chr12 | 66233720  | 66273567  | - | 1.13472  | 2.34095 | 2.06 | 1.04 | 0.00035155  | 0.01197680 |
| Kifc1         | chr17 | 34012610  | 34027578  | - | 2.34263  | 4.81411 | 2.06 | 1.04 | 0.00010713  | 0.00434435 |
| 4930427A07Rik | chr12 | 114394631 | 114403669 | + | 2.6132   | 5.365   | 2.05 | 1.04 | 0.00000198  | 0.00013824 |
| Tacc3         | chr5  | 34000795  | 34014846  | + | 6.17415  | 12.6527 | 2.05 | 1.04 | 0.00000000  | 0.00000012 |
| Prdx4         | chrX  | 151758462 | 151772997 | + | 6.59669  | 13.4833 | 2.04 | 1.03 | 0.00005082  | 0.00227340 |
| Syt6          | chr3  | 103379203 | 103439102 | + | 5.73261  | 11.7032 | 2.04 | 1.03 | 0.00000000  | 0.00000000 |
| Hmggb3        | chrX  | 68809167  | 68813829  | + | 5.29388  | 10.8071 | 2.04 | 1.03 | 0.00000250  | 0.00016632 |
| Aurka         | chr2  | 172181695 | 172196006 | - | 2.87521  | 5.8424  | 2.03 | 1.02 | 0.00012499  | 0.00493959 |

|               |       |           |           |   |          |          |      |      |             |             |
|---------------|-------|-----------|-----------|---|----------|----------|------|------|-------------|-------------|
| BC013712      | chr4  | 132338271 | 132352279 | - | 1.54934  | 3.1245   | 2.02 | 1.01 | 0.00107665  | 0.03063110  |
| Spats2        | chr15 | 98957275  | 99042897  | + | 1.93042  | 3.88138  | 2.01 | 1.01 | 0.00107515  | 0.03063110  |
| Nrp1          | chr8  | 130882972 | 131029375 | + | 2.09267  | 4.20615  | 2.01 | 1.01 | 0.00000010  | 0.00000998  |
| Foxm1         | chr6  | 128313011 | 128335162 | + | 2.76277  | 5.53414  | 2.00 | 1.00 | 0.00000013  | 0.00001296  |
| Ifitm1        | chr7  | 148153327 | 148155726 | + | 8.96156  | 17.7952  | 1.99 | 0.99 | 0.00000163  | 0.00011829  |
| Kit           | chr5  | 75971011  | 76052746  | + | 0.910059 | 1.7996   | 1.98 | 0.98 | 0.00077816  | 0.02355730  |
| Cpd           | chr11 | 76590709  | 76660510  | - | 0.67406  | 1.33227  | 1.98 | 0.98 | 0.00017629  | 0.00667583  |
| Srgap3        | chr6  | 112667965 | 112897260 | - | 0.60005  | 1.18297  | 1.97 | 0.98 | 0.00037199  | 0.01259430  |
| Cdca5         | chr19 | 6085096   | 6091773   | + | 2.10789  | 4.15084  | 1.97 | 0.98 | 0.00180712  | 0.04655700  |
| Entpd1        | chr19 | 40734283  | 40816092  | + | 1.05293  | 2.06907  | 1.97 | 0.97 | 0.00122092  | 0.03403530  |
| Cdc45         | chr16 | 18780539  | 18812065  | - | 3.09324  | 6.06859  | 1.96 | 0.97 | 0.00000208  | 0.00014201  |
| Arhgap19      | chr19 | 41841077  | 41876574  | - | 2.17622  | 4.23576  | 1.95 | 0.96 | 0.00000041  | 0.00003485  |
| Cks2          | chr13 | 51740600  | 51746031  | + | 14.12    | 27.4277  | 1.94 | 0.96 | 0.00000780  | 0.00045588  |
| Cmp1          | chr5  | 37633318  | 37683372  | + | 1.62181  | 3.09697  | 1.91 | 0.93 | 0.00153717  | 0.04145400  |
| Uhrf1         | chr17 | 56442759  | 56462909  | + | 9.29759  | 17.7164  | 1.91 | 0.93 | 0.00000000  | 0.00000000  |
| Bra1          | chr11 | 101350077 | 101413269 | - | 1.40099  | 2.65674  | 1.90 | 0.92 | 0.00001368  | 0.00075089  |
| 483142619Rik  | chr12 | 106168158 | 106248019 | - | 2.64142  | 4.92224  | 1.86 | 0.90 | 0.00000000  | 0.00000000  |
| Hlf0          | chr15 | 78858641  | 78860930  | + | 4.3283   | 8.06391  | 1.86 | 0.90 | 0.00002257  | 0.000116235 |
| Ect2          | chr3  | 26996143  | 27052800  | - | 2.42737  | 4.5111   | 1.86 | 0.89 | 0.00002301  | 0.00117802  |
| Atf6          | chr1  | 172634587 | 172797902 | - | 3.7649   | 4.40022  | 1.85 | 0.89 | 0.00000012  | 0.00001192  |
| Cd163l1       | chr7  | 147404165 | 147417044 | + | 4.00421  | 7.4021   | 1.85 | 0.89 | 0.00000141  | 0.00010486  |
| E2f2          | chr4  | 135728308 | 135751971 | + | 5.7824   | 10.5597  | 1.84 | 0.88 | 0.00000000  | 0.00000011  |
| Xbp1          | chr11 | 5420969   | 5425875   | + | 30.8021  | 56.5616  | 1.84 | 0.88 | 0.00000000  | 0.00000000  |
| Bard1         | chr1  | 71074108  | 71149546  | - | 1.41152  | 2.58686  | 1.83 | 0.87 | 0.00033142  | 0.01139820  |
| Fanca         | chr8  | 125778094 | 125842476 | - | 1.6008   | 2.92713  | 1.83 | 0.87 | 0.00068845  | 0.02143870  |
| Cd19          | chr7  | 133551961 | 133558384 | - | 2.20675  | 4.03446  | 1.83 | 0.87 | 0.00172691  | 0.04533350  |
| Rap1gap2      | chr11 | 74196984  | 74403660  | - | 2.13619  | 3.90103  | 1.83 | 0.87 | 0.00000206  | 0.00014201  |
| Phactr2       | chr10 | 12927522  | 13194202  | - | 0.578195 | 1.05319  | 1.82 | 0.87 | 0.00020793  | 0.00763452  |
| Lgals1        | chr15 | 78757154  | 78760895  | + | 88.2335  | 160.602  | 1.82 | 0.86 | 0.00000000  | 0.00000000  |
| Mef2c         | chr13 | 83643032  | 83806684  | + | 0.945861 | 1.71624  | 1.81 | 0.86 | 0.00018634  | 0.00698178  |
| Brip1         | chr11 | 85871637  | 86014695  | - | 0.922578 | 1.6556   | 1.79 | 0.84 | 0.00122136  | 0.03403530  |
| Napsa         | chr7  | 51827814  | 51842216  | + | 4.02957  | 7.21773  | 1.79 | 0.84 | 0.00180779  | 0.04655700  |
| Kif22         | chr7  | 134171244 | 134185934 | - | 5.18286  | 9.27267  | 1.79 | 0.84 | 0.0003418   | 0.00164366  |
| Adap1         | chr5  | 139747829 | 139801418 | - | 3.77593  | 6.74416  | 1.79 | 0.84 | 0.00015600  | 0.00603349  |
| Whsc1         | chr5  | 34185760  | 34240615  | + | 5.67108  | 10.0487  | 1.77 | 0.83 | 0.00000000  | 0.00000000  |
| Em1           | chr11 | 106258933 | 106349110 | - | 2.40241  | 4.25088  | 1.77 | 0.82 | 0.00012809  | 0.00504383  |
| Plekhg3       | chr12 | 77634546  | 77680026  | + | 1.38855  | 2.44545  | 1.76 | 0.82 | 0.00098511  | 0.02870280  |
| Sox4          | chr13 | 29042598  | 29045551  | - | 2.39773  | 4.22111  | 1.76 | 0.82 | 0.00126332  | 0.03502480  |
| Ctla4         | chr1  | 60965868  | 60972674  | + | 3.72798  | 6.5031   | 1.74 | 0.80 | 0.00182725  | 0.04683610  |
| Sacs          | chr14 | 61757293  | 61877327  | + | 2.65175  | 4.62114  | 1.74 | 0.80 | 0.00041735  | 0.01387070  |
| Cdk6          | chr5  | 3344311   | 3522225   | + | 5.37336  | 9.26834  | 1.72 | 0.79 | 0.00004492  | 0.00211337  |
| Atp2b4        | chr1  | 135599250 | 135650324 | - | 3.66743  | 6.30491  | 1.72 | 0.78 | 0.00000001  | 0.00000133  |
| Cd22          | chr7  | 31650422  | 31665361  | - | 2.80755  | 4.81353  | 1.71 | 0.78 | 0.00005674  | 0.00247578  |
| Ahnak         | chr19 | 9063773   | 9151409   | + | 21.4129  | 36.5355  | 1.71 | 0.77 | 0.00000000  | 0.00000015  |
| Bra2          | chr5  | 151325197 | 151372324 | + | 1.12544  | 1.91959  | 1.71 | 0.77 | 0.00001445  | 0.00078515  |
| Tcf19         | chr17 | 35649679  | 35653769  | + | 7.42904  | 12.6426  | 1.70 | 0.77 | 0.00000002  | 0.00000200  |
| Arhgap11a     | chr2  | 113671649 | 113688818 | - | 3.83351  | 6.51936  | 1.70 | 0.77 | 0.00000221  | 0.00015015  |
| Ndc80         | chr17 | 71845639  | 71876197  | - | 4.25671  | 7.14394  | 1.68 | 0.75 | 0.00058569  | 0.01855760  |
| Atad5         | chr11 | 79902901  | 79949293  | + | 2.14365  | 3.59338  | 1.68 | 0.75 | 0.00002309  | 0.00117802  |
| Lig1          | chr7  | 13844315  | 13896776  | + | 9.09169  | 15.2273  | 1.67 | 0.74 | 0.00000010  | 0.00000997  |
| Klrk1         | chr6  | 129560338 | 129573859 | + | 9.39238  | 15.7058  | 1.67 | 0.74 | 0.00000000  | 0.00000000  |
| Ccr2          | chr9  | 124016921 | 124023879 | + | 7.24538  | 12.0949  | 1.67 | 0.74 | 0.00000122  | 0.00009185  |
| Capg          | chr6  | 72494432  | 72512974  | + | 14.0236  | 23.4011  | 1.67 | 0.74 | 0.00000000  | 0.00000026  |
| Hivep3        | chr4  | 119487282 | 119808016 | + | 1.7862   | 2.97576  | 1.67 | 0.74 | 0.00002139  | 0.00111229  |
| Hmgb2         | chr8  | 59990639  | 59994796  | + | 54.5936  | 60.00573 | 1.66 | 0.73 | 0.00000000  | 0.00000001  |
| Tiam1         | chr16 | 89787355  | 89974944  | - | 1.16879  | 1.9369   | 1.66 | 0.73 | 0.00024553  | 0.00883574  |
| Cobll1        | chr2  | 64926395  | 65076683  | - | 1.60688  | 2.66228  | 1.66 | 0.73 | 0.00017055  | 0.00650370  |
| Crel2         | chr15 | 88650075  | 88657111  | + | 15.9348  | 26.2727  | 1.65 | 0.72 | 0.00000342  | 0.00021736  |
| Lmnb1         | chr18 | 56867466  | 56913079  | + | 24.4836  | 40.0883  | 1.64 | 0.71 | 0.00000000  | 0.00000016  |
| Fanci         | chr7  | 86537223  | 86611159  | + | 2.5329   | 4.1407   | 1.63 | 0.71 | 0.00081670  | 0.02445150  |
| Cdca7         | chr2  | 72314275  | 72324947  | + | 7.80172  | 12.6939  | 1.63 | 0.70 | 0.00003154  | 0.00154401  |
| 6720401G13Rik | chrX  | 47909820  | 47988435  | - | 1.38212  | 2.23516  | 1.62 | 0.69 | 0.00078284  | 0.02363320  |
| Irf4          | chr13 | 30841126  | 30858796  | + | 5.97308  | 9.6531   | 1.62 | 0.69 | 0.00000264  | 0.00017259  |
| Zbtb37        | chr1  | 162947886 | 162964390 | - | 3.81843  | 6.16803  | 1.62 | 0.69 | 0.00018759  | 0.00698178  |
| Gmnn          | chr13 | 24843713  | 24853806  | - | 9.51011  | 15.335   | 1.61 | 0.69 | 0.00188544  | 0.04787620  |
| Polr1         | chrX  | 90550104  | 90877494  | - | 4.01821  | 6.45418  | 1.61 | 0.68 | 0.00001571  | 0.00084117  |
| Myb           | chr10 | 20844735  | 20880790  | - | 13.2903  | 21.1589  | 1.59 | 0.67 | 0.00000000  | 0.00000006  |
| Myadm         | chr7  | 3289038   | 3299350   | + | 3.25881  | 5.18606  | 1.59 | 0.67 | 0.00076863  | 0.02333360  |
| Rrm1          | chr7  | 109590208 | 109618285 | + | 15.2627  | 24.2587  | 1.59 | 0.67 | 0.00000003  | 0.00000293  |
| Hipk2         | chr6  | 38647838  | 38826189  | + | 5.23015  | 8.29253  | 1.59 | 0.66 | 0.00000001  | 0.00000075  |
| Adam8         | chr7  | 147164839 | 147178387 | - | 3.84844  | 6.09521  | 1.58 | 0.66 | 0.00105255  | 0.03058130  |
| Hells         | chr19 | 39005479  | 39042767  | + | 6.99198  | 11.0532  | 1.58 | 0.66 | 0.00004721  | 0.00216503  |
| Polg          | chr16 | 37011871  | 37095503  | + | 1.25444  | 1.98233  | 1.58 | 0.66 | 0.00151824  | 0.04114780  |
| Tyms          | chr5  | 30384739  | 30400165  | - | 3.1149   | 4.89681  | 1.57 | 0.65 | 0.00081078  | 0.02434140  |
| Cd74          | chr18 | 60963502  | 60972306  | + | 133.393  | 208.576  | 1.56 | 0.64 | 0.00000000  | 0.00000000  |
| Acpp          | chr9  | 104190569 | 104240052 | - | 9.28211  | 14.4775  | 1.56 | 0.64 | 0.00000041  | 0.00003519  |
| Il18rap       | chr1  | 40572206  | 40606142  | + | 9.11682  | 14.1314  | 1.55 | 0.63 | 0.00004965  | 0.00223907  |
| Ncapd2        | chr6  | 125118024 | 125141604 | + | 14.6183  | 22.6444  | 1.55 | 0.63 | 0.00000009  | 0.00000934  |
| Runx2         | chr17 | 44740949  | 45256233  | - | 3.84366  | 5.93377  | 1.54 | 0.63 | 0.00000011  | 0.00001089  |
| Wdfy4         | chr14 | 33772732  | 33998252  | - | 2.72125  | 4.1981   | 1.54 | 0.63 | 0.00004601  | 0.00214605  |
| Vasn          | chr16 | 4626883   | 4679720   | + | 4.13954  | 6.38128  | 1.54 | 0.62 | 0.00151764  | 0.04114780  |
| Incpn         | chr19 | 9946786   | 9974023   | - | 11.2596  | 17.3559  | 1.54 | 0.62 | 0.00000249  | 0.00016632  |
| Foxrd2        | chr15 | 77770951  | 77787152  | - | 2.40696  | 3.70705  | 1.54 | 0.62 | 0.00050835  | 0.01634540  |
| Sytl3         | chr17 | 6877959   | 6942393   | + | 23.0712  | 35.4076  | 1.53 | 0.62 | 0.00000001  | 0.00000115  |
| Slamf7        | chr1  | 173562533 | 173583168 | - | 6.86265  | 10.4929  | 1.53 | 0.61 | 0.00004703  | 0.00216503  |
| Rnf216        | chr5  | 143752571 | 143874699 | - | 2.66932  | 3.75269  | 1.52 | 0.60 | 0.00025694  | 0.00915531  |
| Cenpa         | chr5  | 30969274  | 30977199  | + | 12.0859  | 18.325   | 1.52 | 0.60 | 0.00114981  | 0.03237330  |
| 2900026A02Rik | chr5  | 113515342 | 113592333 | - | 2.40854  | 3.65179  | 1.52 | 0.60 | 0.000173796 | 0.04533450  |
| Tmp1          | chr4  | 133047014 | 133054465 | - | 17.711   | 26.7919  | 1.51 | 0.60 | 0.00004589  | 0.00214605  |

|               |       |           |           |   |         |         |      |      |             |            |
|---------------|-------|-----------|-----------|---|---------|---------|------|------|-------------|------------|
| Myo5a         | chr9  | 74919012  | 75071494  | + | 2.55498 | 3.84414 | 1.50 | 0.59 | 0.00005083  | 0.00227340 |
| Pou2af1       | chr9  | 51021794  | 51048184  | + | 13.6466 | 20.4399 | 1.50 | 0.58 | 0.00004689  | 0.00216503 |
| Kpna2         | chr11 | 106849942 | 106860839 | - | 29.6233 | 44.1981 | 1.49 | 0.58 | 0.00000196  | 0.00013737 |
| Ezh2          | chr6  | 47480272  | 47545029  | - | 12.643  | 18.8025 | 1.49 | 0.57 | 0.00000021  | 0.00002003 |
| Ldlr          | chr9  | 21528019  | 21554362  | + | 4.33751 | 6.40559 | 1.48 | 0.56 | 0.000082524 | 0.02457180 |
| Gsg2          | chr11 | 72904096  | 72960951  | - | 12.0689 | 17.6611 | 1.46 | 0.55 | 0.00006910  | 0.00292197 |
| Pole          | chr5  | 110715337 | 110766472 | + | 3.36875 | 4.91221 | 1.46 | 0.54 | 0.00044688  | 0.01467290 |
| Itgb1         | chr8  | 131209553 | 131257479 | + | 57.0935 | 83.0261 | 1.45 | 0.54 | 0.00000335  | 0.00021389 |
| H2-Ab1        | chr17 | 34400171  | 34406363  | + | 42.8204 | 62.2222 | 1.45 | 0.54 | 0.00003083  | 0.00151591 |
| Rrbp1         | chr2  | 143773130 | 143836999 | - | 14.4862 | 20.9126 | 1.44 | 0.53 | 0.00000145  | 0.00010668 |
| Csda          | chr6  | 131314875 | 131338468 | - | 19.8615 | 28.5526 | 1.44 | 0.52 | 0.00000818  | 0.00047062 |
| Mast2         | chr4  | 115979366 | 116136788 | - | 4.05846 | 5.83044 | 1.44 | 0.52 | 0.00000279  | 0.00018154 |
| Fut8          | chr12 | 78339090  | 78576983  | + | 14.0025 | 20.0812 | 1.43 | 0.52 | 0.00000001  | 0.00000129 |
| Fam129a       | chr1  | 153418502 | 153566477 | + | 5.40175 | 7.73657 | 1.43 | 0.52 | 0.00153312  | 0.04144770 |
| Baz2b         | chr2  | 59737419  | 59963797  | - | 4.61737 | 6.59916 | 1.43 | 0.52 | 0.00012906  | 0.00506378 |
| Ccdc50        | chr16 | 27389062  | 27452304  | + | 9.30244 | 13.1895 | 1.42 | 0.50 | 0.00000000  | 0.00000006 |
| Hsp90b1       | chr10 | 86153585  | 86168189  | - | 150.36  | 213.057 | 1.42 | 0.50 | 0.00006423  | 0.00276986 |
| Smc2          | chr4  | 52452120  | 52501131  | + | 10.2508 | 14.5015 | 1.41 | 0.50 | 0.00004820  | 0.00220122 |
| Txndc5        | chr13 | 38592143  | 38620329  | - | 34.9961 | 49.4377 | 1.41 | 0.50 | 0.00001407  | 0.00076826 |
| D730040F13Rik | chr4  | 56888884  | 56960301  | - | 7.16397 | 10.1014 | 1.41 | 0.50 | 0.00018216  | 0.00685019 |
| Cd79b         | chr11 | 106172654 | 106175843 | - | 25.0797 | 35.261  | 1.41 | 0.49 | 0.00088494  | 0.02620580 |
| Ciita         | chr16 | 10480164  | 10527657  | + | 1.91288 | 2.68124 | 1.40 | 0.49 | 0.00079698  | 0.02399320 |
| Wdhd1         | chr14 | 47860618  | 47896532  | - | 6.86155 | 9.608   | 1.40 | 0.49 | 0.00092084  | 0.02712120 |
| Kif20b        | chr19 | 34996847  | 35050221  | + | 4.33713 | 6.06925 | 1.40 | 0.48 | 0.00157403  | 0.04203080 |
| Gm4759        | chr7  | 113565063 | 113584587 | - | 26.1986 | 36.6582 | 1.40 | 0.48 | 0.00005519  | 0.00242820 |
| Fyco1         | chr9  | 123698627 | 123761020 | - | 14.0992 | 19.6075 | 1.39 | 0.48 | 0.00000457  | 0.00027765 |
| Acof7         | chr4  | 151552208 | 151645964 | + | 11.6288 | 16.046  | 1.38 | 0.46 | 0.00032042  | 0.01109030 |
| Pde1b         | chr15 | 103333228 | 103360483 | + | 12.1583 | 16.7639 | 1.38 | 0.46 | 0.00063375  | 0.01979200 |
| Rad18         | chr6  | 112569844 | 112646664 | - | 6.82619 | 9.37527 | 1.37 | 0.46 | 0.00070661  | 0.02181660 |
| Dut           | chr2  | 125072983 | 125084785 | + | 14.8046 | 20.2988 | 1.37 | 0.46 | 0.00000123  | 0.00009185 |
| Cd44          | chr2  | 102651299 | 102741822 | - | 13.4436 | 18.3418 | 1.36 | 0.45 | 0.00019793  | 0.00729172 |
| 8-Sep         | chr11 | 53333237  | 53357598  | + | 2.89686 | 3.94822 | 1.36 | 0.45 | 0.00082336  | 0.02457180 |
| Trip11        | chr12 | 103075581 | 103151381 | - | 11.4334 | 15.5292 | 1.36 | 0.44 | 0.00015773  | 0.00607858 |
| Fkbp5         | chr17 | 28536039  | 28623057  | - | 35.3406 | 47.9891 | 1.36 | 0.44 | 0.00003982  | 0.00188998 |
| Hip1r         | chr5  | 124423636 | 124453224 | + | 12.2865 | 16.6755 | 1.36 | 0.44 | 0.00032468  | 0.01120190 |
| Mcm3          | chr1  | 20793094  | 20810294  | - | 28.831  | 39.0812 | 1.36 | 0.44 | 0.00013264  | 0.00518521 |
| Carns1        | chr19 | 4164323   | 4175479   | - | 9.51385 | 12.8175 | 1.35 | 0.43 | 0.00155901  | 0.04193900 |
| H2-Aa         | chr17 | 34419695  | 34424716  | - | 69.1243 | 92.6845 | 1.34 | 0.42 | 0.00062689  | 0.01969070 |
| Itga4         | chr2  | 79095582  | 79269145  | + | 69.6957 | 93.0326 | 1.33 | 0.42 | 0.00186519  | 0.04754700 |
| Nfic          | chr10 | 80858935  | 80889918  | - | 6.28514 | 8.34668 | 1.33 | 0.41 | 0.00022708  | 0.00825371 |
| Ctla2a        | chr13 | 61035515  | 61037986  | - | 19.4388 | 25.7897 | 1.33 | 0.41 | 0.00186734  | 0.04754700 |
| Tfdp1         | chr8  | 13339673  | 13377702  | + | 26.1637 | 34.6429 | 1.32 | 0.40 | 0.00178075  | 0.04607890 |
| Tpi1          | chr6  | 124758958 | 124764314 | - | 33.5171 | 44.3095 | 1.32 | 0.40 | 0.00117720  | 0.03305890 |
| Lman1         | chr18 | 66140392  | 66162289  | - | 11.5044 | 15.1765 | 1.32 | 0.40 | 0.00106753  | 0.03058130 |
| Golgb1        | chr16 | 36880604  | 36933171  | + | 9.32996 | 12.2956 | 1.32 | 0.40 | 0.00034964  | 0.01194940 |
| Zmiz1         | chr14 | 26278670  | 26486233  | + | 15.6506 | 20.6182 | 1.32 | 0.40 | 0.00045139  | 0.01473420 |
| Ptprs         | chr17 | 56551848  | 56615903  | - | 4.96865 | 6.52787 | 1.31 | 0.39 | 0.00011521  | 0.00462012 |
| Cbl           | chr9  | 43957344  | 44042129  | - | 39.9394 | 52.2603 | 1.31 | 0.39 | 0.00073526  | 0.02257280 |
| Cbx5          | chr15 | 103021976 | 103070247 | - | 14.7657 | 19.3207 | 1.31 | 0.39 | 0.00000348  | 0.00021840 |
| Dbf4          | chr5  | 8396968   | 8422716   | - | 12.0023 | 15.6779 | 1.31 | 0.39 | 0.00163405  | 0.04342020 |
| Mcm5          | chr8  | 77633426  | 77652338  | + | 23.2788 | 30.2891 | 1.30 | 0.38 | 0.00114047  | 0.03219380 |
| Atxn1         | chr13 | 45645124  | 46060360  | - | 3.94749 | 5.1252  | 1.30 | 0.38 | 0.00016861  | 0.00645240 |
| Il18r1        | chr1  | 40522396  | 40557699  | + | 37.4566 | 48.5128 | 1.30 | 0.37 | 0.00004669  | 0.00216503 |
| Zbed6         | chr1  | 135516447 | 135557957 | - | 17.486  | 22.6069 | 1.29 | 0.37 | 0.00143603  | 0.03951070 |
| Tulp4         | chr17 | 6106829   | 6240637   | + | 10.2739 | 13.2729 | 1.29 | 0.37 | 0.00000025  | 0.00002270 |
| Camk4         | chr18 | 33098694  | 33355421  | + | 10.4971 | 13.5417 | 1.29 | 0.37 | 0.00105963  | 0.03058130 |
| Xrn1          | chr9  | 95855178  | 95953448  | + | 16.2551 | 20.9434 | 1.29 | 0.37 | 0.00174317  | 0.04533450 |
| Lpp           | chr16 | 24392641  | 24992664  | + | 3.78445 | 4.87051 | 1.29 | 0.36 | 0.00001766  | 0.00094090 |
| Ankrd52       | chr10 | 127814179 | 127831062 | + | 20.0574 | 25.7447 | 1.28 | 0.36 | 0.00120502  | 0.03375300 |
| Cdc25b        | chr2  | 131012683 | 131024247 | + | 22.6742 | 29.0484 | 1.28 | 0.36 | 0.00000068  | 0.00005594 |
| Cep110        | chr2  | 34965011  | 35034342  | + | 37.9508 | 48.5698 | 1.28 | 0.36 | 0.00000001  | 0.00000177 |
| Macf1         | chr4  | 123026875 | 123361603 | - | 105.597 | 135.028 | 1.28 | 0.35 | 0.00039509  | 0.01321180 |
| Akap9         | chr5  | 3928185   | 4080204   | + | 11.4165 | 14.5622 | 1.28 | 0.35 | 0.00170780  | 0.04495740 |
| Tom1l2        | chr11 | 60040215  | 60166407  | - | 7.69296 | 9.78044 | 1.27 | 0.35 | 0.00147895  | 0.04058910 |
| Nfat5         | chr8  | 109817369 | 109903417 | + | 12.2438 | 15.4018 | 1.26 | 0.33 | 0.00000000  | 0.00000000 |
| Rcbtb2        | chr14 | 73542316  | 73583861  | + | 15.1652 | 19.0279 | 1.25 | 0.33 | 0.00076015  | 0.02314110 |
| Cep250        | chr2  | 155782293 | 155824636 | + | 14.8938 | 18.6439 | 1.25 | 0.32 | 0.00000000  | 0.00000002 |
| Pik3cg        | chr12 | 32858261  | 32893514  | - | 15.8886 | 19.6199 | 1.23 | 0.30 | 0.00148427  | 0.04063250 |
| Zfp280c       | chrX  | 45894802  | 45947629  | - | 13.4061 | 16.4746 | 1.23 | 0.30 | 0.00000498  | 0.00029729 |
| Taf1d         | chr9  | 15087780  | 15162232  | + | 46.1427 | 56.5385 | 1.23 | 0.29 | 0.00015584  | 0.00603349 |
| Zfp192        | chr13 | 21605089  | 21622983  | - | 6.4649  | 7.90692 | 1.22 | 0.29 | 0.00163944  | 0.04345720 |
| Gta1          | chr2  | 35255698  | 35316945  | - | 10.76   | 13.0629 | 1.21 | 0.28 | 0.00174363  | 0.04533450 |
| Nin           | chr12 | 71112421  | 71212912  | - | 25.8502 | 30.9919 | 1.20 | 0.26 | 0.00021967  | 0.00801144 |
| Abi2          | chr1  | 158488917 | 158579750 | + | 8.4283  | 10.0652 | 1.19 | 0.26 | 0.00000847  | 0.00047918 |
| Pou2f1        | chr1  | 167718811 | 167932765 | - | 8.21566 | 9.79866 | 1.19 | 0.25 | 0.00106669  | 0.03058130 |
| Klc1          | chr12 | 112997059 | 113052052 | + | 18.6516 | 22.2441 | 1.19 | 0.25 | 0.00023670  | 0.00857473 |
| Eif4g3        | chr4  | 137549370 | 137762994 | + | 35.7142 | 42.5093 | 1.19 | 0.25 | 0.00000113  | 0.00008565 |
| Dido1         | chr2  | 180392668 | 180444704 | - | 24.2705 | 28.8544 | 1.19 | 0.25 | 0.00018699  | 0.00698178 |
| Atp2a2        | chr5  | 122903521 | 122952234 | - | 36.9594 | 43.7518 | 1.18 | 0.24 | 0.00174024  | 0.04533450 |
| Jmjd1c        | chr10 | 66590005  | 66719074  | + | 22.4002 | 26.4068 | 1.18 | 0.24 | 0.00013633  | 0.00531046 |
| Pan2          | chr10 | 127740390 | 127758414 | + | 19.9635 | 23.5339 | 1.18 | 0.24 | 0.00024839  | 0.00890907 |
| Smc5          | chr19 | 23280930  | 23348387  | - | 11.7024 | 13.7503 | 1.17 | 0.23 | 0.00106644  | 0.03058130 |
| Tnk2          | chr16 | 32644728  | 32683579  | + | 21.7727 | 25.5133 | 1.17 | 0.23 | 0.00005695  | 0.00247578 |
| Orc3          | chr4  | 34497863  | 34562191  | - | 13.0445 | 15.2701 | 1.17 | 0.23 | 0.00030343  | 0.01053590 |
| Kdm2b         | chr5  | 123320684 | 123439101 | - | 11.4803 | 13.4098 | 1.17 | 0.22 | 0.00110220  | 0.03119660 |
| Cdk12         | chr11 | 98064618  | 98114854  | + | 18.0938 | 21.0531 | 1.16 | 0.22 | 0.00000036  | 0.00003187 |
| Ino80d        | chr1  | 63094374  | 63160841  | - | 13.5591 | 15.7223 | 1.16 | 0.21 | 0.00000169  | 0.00012137 |
| Rbm3          | chrX  | 7716100   | 7725089   | - | 370.863 | 429.848 | 1.16 | 0.21 | 0.00003437  | 0.00164558 |
| 4833420G17Rik | chr13 | 120251565 | 120274924 | + | 39.6979 | 45.9551 | 1.16 | 0.21 | 0.00058757  | 0.01856320 |

|            |       |           |           |   |         |         |      |       |             |            |
|------------|-------|-----------|-----------|---|---------|---------|------|-------|-------------|------------|
| Ubr5       | chr15 | 37897082  | 38008608  | - | 30.9643 | 35.8405 | 1.16 | 0.21  | 0.00000034  | 0.00003045 |
| Vps39      | chr2  | 120142196 | 120178869 | - | 18.166  | 21.016  | 1.16 | 0.21  | 0.00045705  | 0.01487200 |
| Tnp01      | chr13 | 99612035  | 99696339  | - | 41.7803 | 48.1939 | 1.15 | 0.21  | 0.00009579  | 0.00394324 |
| Atp2a3     | chr11 | 72774670  | 72806545  | + | 104.754 | 120.516 | 1.15 | 0.20  | 0.00000000  | 0.00000000 |
| Ubr2       | chr17 | 47065239  | 47147481  | - | 30.1701 | 34.6052 | 1.15 | 0.20  | 0.00005220  | 0.00232517 |
| Phc3       | chr3  | 30798216  | 30868337  | - | 21.7167 | 24.8817 | 1.15 | 0.20  | 0.00000598  | 0.00035318 |
| Ncor1      | chr11 | 62094974  | 62270834  | - | 62.2753 | 71.1717 | 1.14 | 0.19  | 0.00018160  | 0.00685019 |
| Gabpb2     | chr3  | 94985689  | 95021864  | - | 40.7483 | 46.4246 | 1.14 | 0.19  | 0.00000004  | 0.00000434 |
| Atp13a3    | chr16 | 30312509  | 30388616  | - | 39.1522 | 44.5292 | 1.14 | 0.19  | 0.00011220  | 0.00451609 |
| Ciz1       | chr2  | 32218529  | 32233833  | + | 25.2373 | 28.6863 | 1.14 | 0.18  | 0.00008949  | 0.02741540 |
| Zfp207     | chr11 | 80196780  | 80219375  | + | 90.2623 | 102.492 | 1.14 | 0.18  | 0.00043377  | 0.01432700 |
| Tnrc6b     | chr15 | 80541742  | 80771516  | + | 21.5355 | 24.4231 | 1.13 | 0.18  | 0.00000104  | 0.00008091 |
| Ncor2      | chr5  | 125497522 | 125659584 | - | 20.2265 | 22.9126 | 1.13 | 0.18  | 0.00000014  | 0.00001383 |
| Smarca4    | chr9  | 21420612  | 21508674  | + | 31.9715 | 36.1845 | 1.13 | 0.18  | 0.00000000  | 0.00000000 |
| Mink1      | chr11 | 70376382  | 70427984  | + | 30.4138 | 34.3947 | 1.13 | 0.18  | 0.00008949  | 0.00369818 |
| Tacc1      | chr8  | 26265203  | 26311921  | - | 31.8701 | 35.9245 | 1.13 | 0.17  | 0.00009643  | 0.00395471 |
| Trpm7      | chr2  | 126617293 | 126701997 | - | 31.5063 | 35.5133 | 1.13 | 0.17  | 0.00039826  | 0.01327700 |
| Upb1       | chr9  | 113840051 | 113935869 | + | 40.4668 | 45.5576 | 1.13 | 0.17  | 0.00110227  | 0.03119660 |
| Myo9b      | chr8  | 73796612  | 73884611  | + | 39.2481 | 44.0691 | 1.12 | 0.17  | 0.00000489  | 0.00029343 |
| Plekhg2    | chr7  | 29144622  | 29157681  | - | 32.582  | 36.4095 | 1.12 | 0.16  | 0.00138760  | 0.03827510 |
| Aak1       | chr6  | 86799510  | 86953221  | + | 19.9326 | 22.2722 | 1.12 | 0.16  | 0.00000322  | 0.00020720 |
| Prc2b      | chr2  | 32006667  | 32090057  | + | 56.8607 | 63.1622 | 1.11 | 0.15  | 0.00012421  | 0.00492669 |
| Tcof1      | chr18 | 60973409  | 61008618  | - | 41.9952 | 46.631  | 1.11 | 0.15  | 0.00026827  | 0.00943528 |
| Erbp2ip    | chr13 | 104608865 | 104710594 | - | 50.8063 | 56.151  | 1.11 | 0.14  | 0.00001543  | 0.00083016 |
| Srst11     | chr3  | 157673456 | 157699603 | - | 67.4155 | 74.3196 | 1.10 | 0.14  | 0.00000012  | 0.00001233 |
| Nolc1      | chr19 | 46150352  | 46160020  | + | 31.1797 | 34.342  | 1.10 | 0.14  | 0.00026510  | 0.00935410 |
| Txnip      | chr3  | 96359690  | 96370724  | + | 284.427 | 313.223 | 1.10 | 0.14  | 0.00000530  | 0.00031452 |
| Cic        | chr7  | 26067197  | 26079167  | + | 40.7874 | 44.8905 | 1.10 | 0.14  | 0.000021079 | 0.00771320 |
| Bclaf1     | chr10 | 20032274  | 20062307  | + | 49.6633 | 54.5939 | 1.10 | 0.14  | 0.00000000  | 0.00000042 |
| Srtr       | chr5  | 137736931 | 137748902 | - | 64.819  | 71.2328 | 1.10 | 0.14  | 0.00157034  | 0.04203080 |
| Tcf12      | chr9  | 71692058  | 71959626  | - | 43.3825 | 47.4063 | 1.09 | 0.13  | 0.00002229  | 0.00115379 |
| Otud4      | chr8  | 82163574  | 82201654  | + | 36.679  | 39.9081 | 1.09 | 0.12  | 0.00186810  | 0.04754700 |
| Sbf1       | chr15 | 89118666  | 89145742  | - | 70.0973 | 75.8389 | 1.08 | 0.11  | 0.00046673  | 0.01514170 |
| Slc38a1    | chr15 | 96401848  | 96473344  | + | 41.9327 | 45.3183 | 1.08 | 0.11  | 0.00007494  | 0.00315663 |
| Dnm2       | chr9  | 21229351  | 21314630  | + | 92.1961 | 99.4405 | 1.08 | 0.11  | 0.00000000  | 0.00000038 |
| Hnrmpc     | chr14 | 52693054  | 52723703  | - | 124.601 | 119.393 | 0.96 | -0.06 | 0.00001126  | 0.00063107 |
| Samhd1     | chr2  | 156923264 | 156960958 | - | 149.531 | 139.212 | 0.93 | -0.10 | 0.00043503  | 0.01432700 |
| DI6Erd472e | chr16 | 78540580  | 78576933  | - | 27.8968 | 25.9676 | 0.93 | -0.10 | 0.00038724  | 0.01298940 |
| Gtf2i      | chr5  | 134713703 | 134790616 | - | 99.3811 | 91.0876 | 0.92 | -0.13 | 0.00028977  | 0.01009360 |
| Foxp1      | chr6  | 98875335  | 99385339  | - | 48.5973 | 44.2328 | 0.91 | -0.14 | 0.00000000  | 0.00000000 |
| Tapbp      | chr17 | 34056422  | 34066235  | + | 169.977 | 153.997 | 0.91 | -0.14 | 0.00048020  | 0.01553230 |
| Ube2h      | chr6  | 30161288  | 30254539  | - | 64.1776 | 57.4049 | 0.89 | -0.16 | 0.00181421  | 0.04661180 |
| Irf9       | chr14 | 56222821  | 56228867  | + | 64.1128 | 55.6208 | 0.87 | -0.20 | 0.00090237  | 0.02664940 |
| Rnf138     | chr18 | 21159841  | 21186724  | + | 30.5337 | 25.4267 | 0.83 | -0.26 | 0.00050736  | 0.01634540 |
| Irf271l    | chr12 | 104672398 | 104678455 | + | 95.6508 | 78.2059 | 0.82 | -0.29 | 0.00002676  | 0.00133404 |
| Ccr9       | chr9  | 123676328 | 123692575 | + | 44.8095 | 36.0769 | 0.81 | -0.31 | 0.00001362  | 0.00075089 |
| Tgtp2      | chr11 | 48851161  | 48948889  | - | 72.048  | 56.9009 | 0.79 | -0.34 | 0.00005287  | 0.00234549 |
| Slfn5      | chr11 | 82724754  | 82778352  | + | 26.7938 | 20.3914 | 0.76 | -0.39 | 0.00054802  | 0.01751720 |
| Irf2712a   | chr12 | 104680376 | 104681890 | - | 150.988 | 110.682 | 0.73 | -0.45 | 0.00097649  | 0.02852830 |
| Art2b      | chr7  | 108727373 | 108729675 | - | 86.0613 | 63.0358 | 0.73 | -0.45 | 0.00070434  | 0.02180840 |
| Gml4446    | chr19 | 34667377  | 34676458  | - | 78.9068 | 57.4356 | 0.73 | -0.46 | 0.00000000  | 0.00000000 |
| Irf7       | chr7  | 148449081 | 148452323 | - | 72.6063 | 51.2472 | 0.71 | -0.50 | 0.00000000  | 0.00000000 |
| Isg15      | chr4  | 155573532 | 155574927 | - | 36.0247 | 23.7927 | 0.66 | -0.60 | 0.00137894  | 0.03813300 |
| Rtp4       | chr16 | 23610004  | 23614308  | + | 40.2341 | 24.8563 | 0.62 | -0.69 | 0.00000075  | 0.00006093 |
| Oas2       | chr5  | 121180341 | 121199857 | - | 13.1092 | 8.04455 | 0.61 | -0.70 | 0.00000316  | 0.00020461 |
| Gbp10      | chr5  | 105644717 | 105668552 | - | 6.38986 | 3.8756  | 0.61 | -0.72 | 0.00058109  | 0.01851980 |
| Irf3       | chr19 | 34658018  | 34663472  | + | 21.956  | 13.096  | 0.60 | -0.75 | 0.00000225  | 0.00015208 |
| Lars2      | chr9  | 123276057 | 123371782 | + | 371.428 | 213.705 | 0.58 | -0.80 | 0.00000003  | 0.00000388 |
| Oas12      | chr5  | 115346942 | 115362254 | + | 9.59107 | 5.50266 | 0.57 | -0.80 | 0.00001919  | 0.00100271 |
| Irf1       | chr19 | 34715378  | 34724499  | + | 22.3374 | 12.4361 | 0.56 | -0.84 | 0.00000001  | 0.00000131 |
| Klra13-ps  | chr6  | 129922099 | 130336892 | - | 4.50487 | 0       | 0.00 | 0.00  | 0.00000145  | 0.00010668 |

**SUPPLEMENTAL TABLE I.** Differential gene expression is observed in CD8<sup>+</sup> T cells from naïve mice developmentally exposed to Veh or TCDD, and from infected mice developmentally exposed to Veh or TCDD. Genes with differential expression at FDR<5% are shown.
